# Supplementary material
Source: PubMed Central journal article supplement (PMC6994990)
Supplement: pnas.1914267117.sapp.pdf [file pnas.1914267117.sapp.pdf]

## Wooton-Kee et al. Supplemental Material

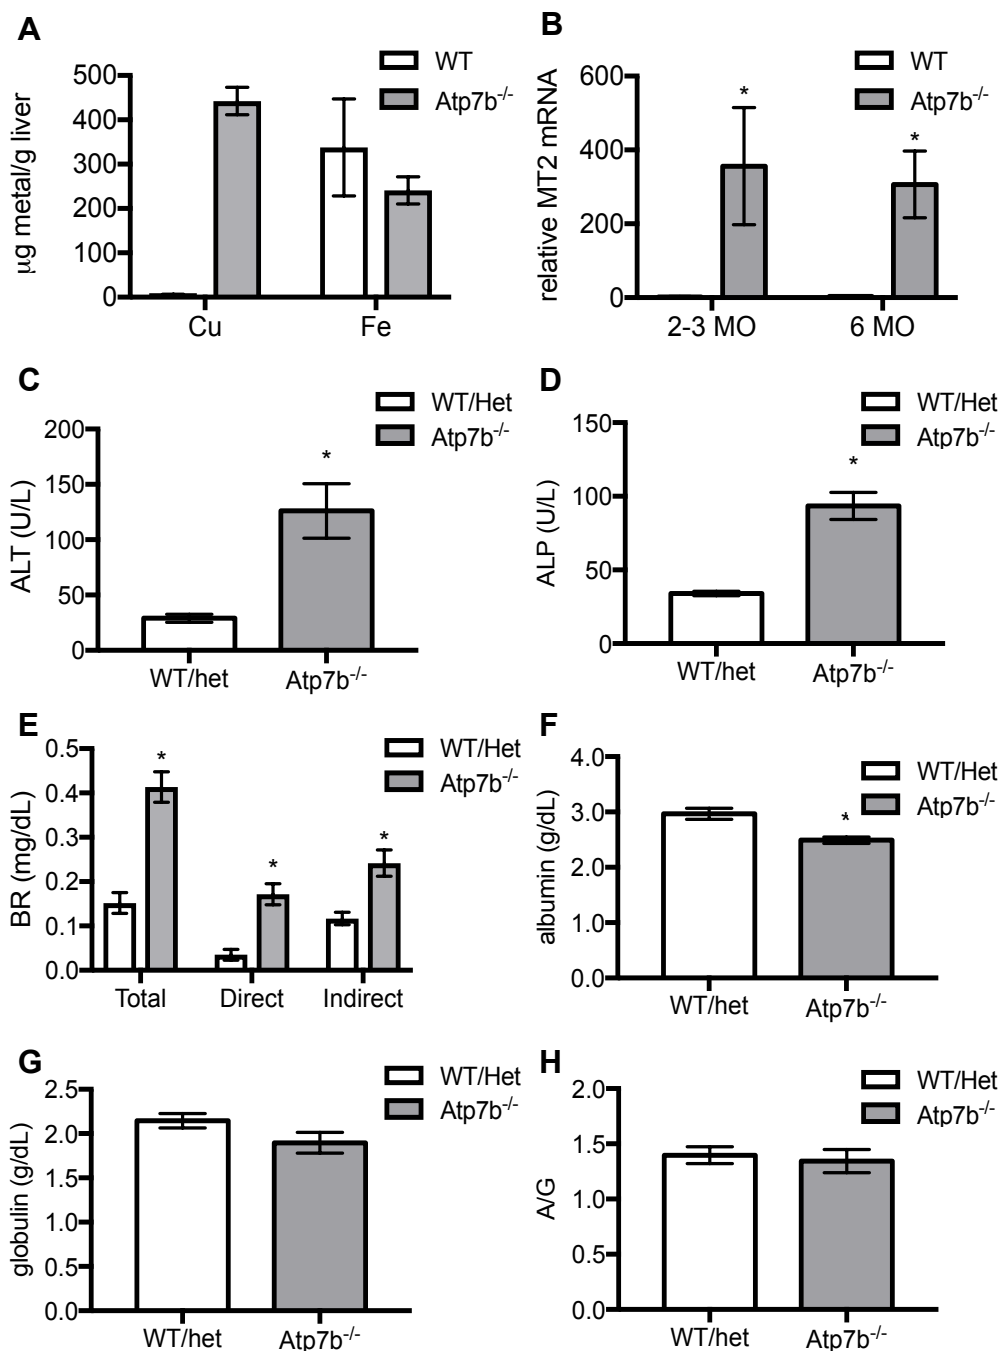

**Supplemental Figure 1. Metal concentrations, metallothionein expression and liver function in WT and *Atp7b*<sup>-/-</sup> mice.** (A) Hepatic copper (Cu) and iron (Fe) measurements in WT and *Atp7b*<sup>-/-</sup> mice at 3-7 months of age. n = 2 for WT, and n = 3 for *Atp7b*<sup>-/-</sup> mice. (B) Hepatic metallothionein 2 (*Mt2*) expression in WT and *Atp7b*<sup>-/-</sup> mice aged 2-3 and 6 months of age. (C-H) Serum chemistry measurements in WT and *Atp7b*<sup>-/-</sup> mice, aged 5-7 months old. (C) alkaline transaminase (ALT), (D) alkaline phosphatase, (E) bilirubin, (F) albumin, (G) globulin, (H) albumin/globulin ratio. Shown are the mean  $\pm$  SEM for n = 5 samples, \* P < 0.05, Student's t-test.

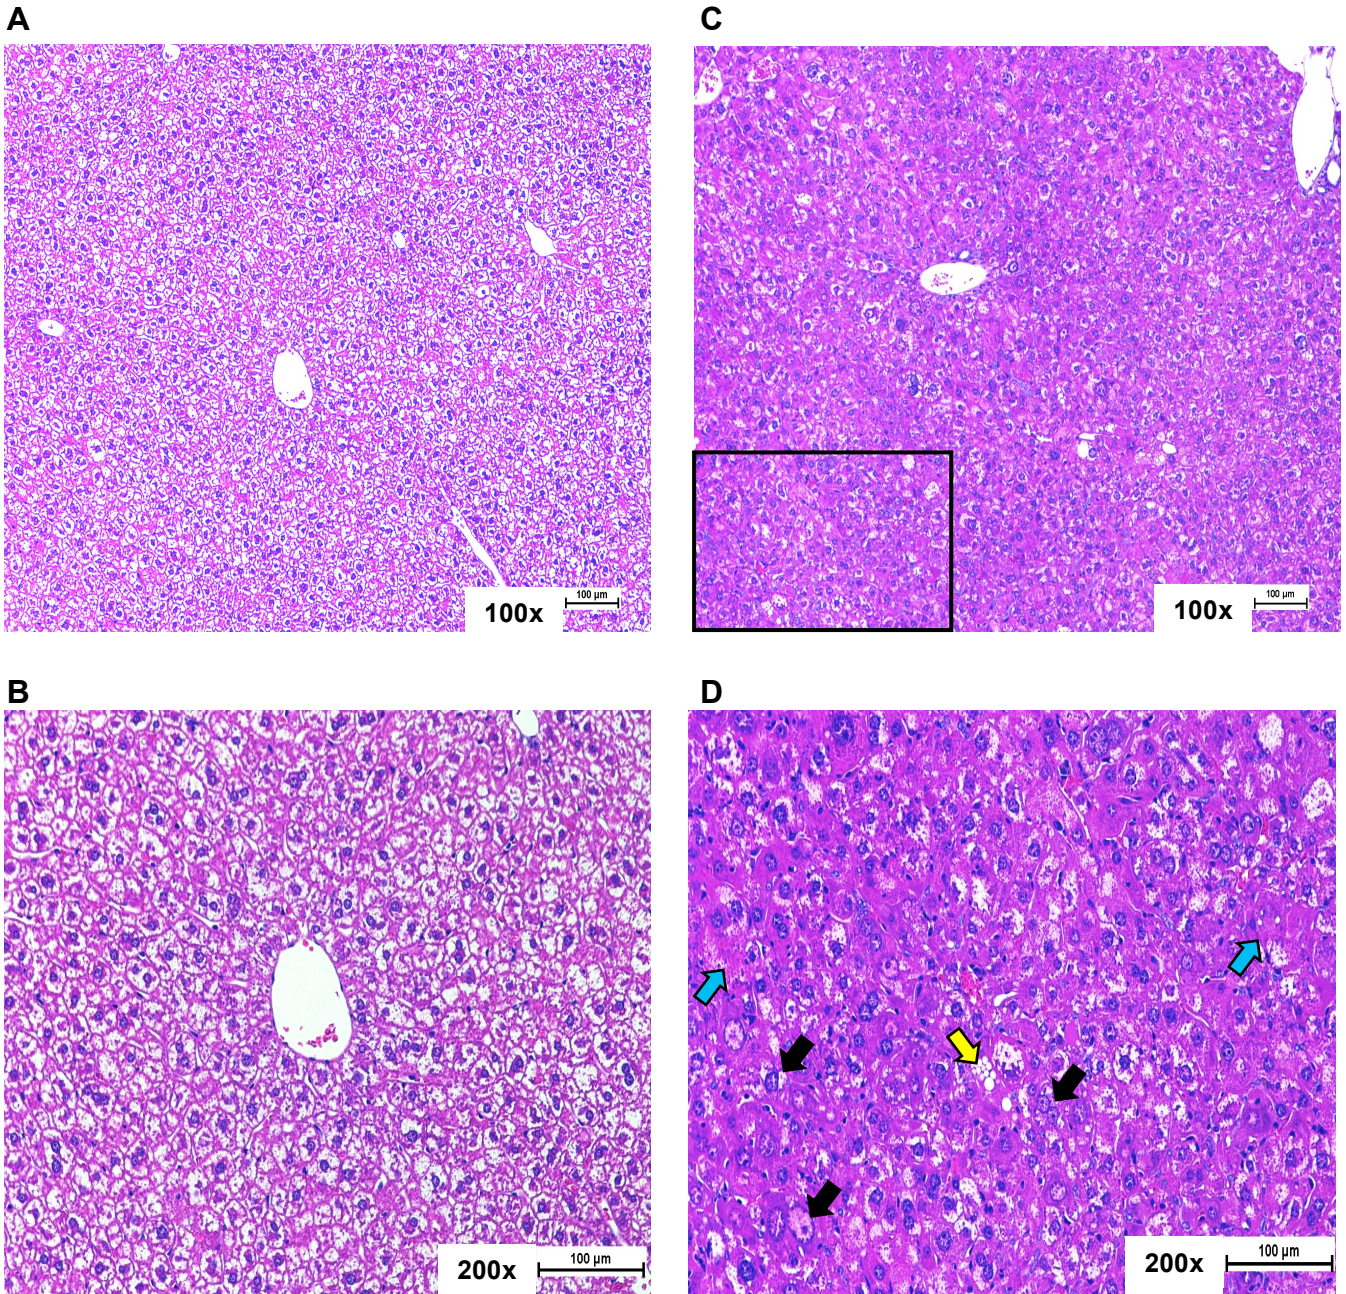

**Supplemental Figure 2. H&E staining of WT and *Atp7b*<sup>-/-</sup> livers.** H&E staining of 6-month old (A, B) WT and (C, D) *Atp7b*<sup>-/-</sup> mice on chow diet at 10x (A, B) and 20x (C, D) magnification. Black arrows point to eosinophilic nuclear inclusions. Yellow arrows point to microsteatosis. Blue arrows show hepatocyte ballooning.

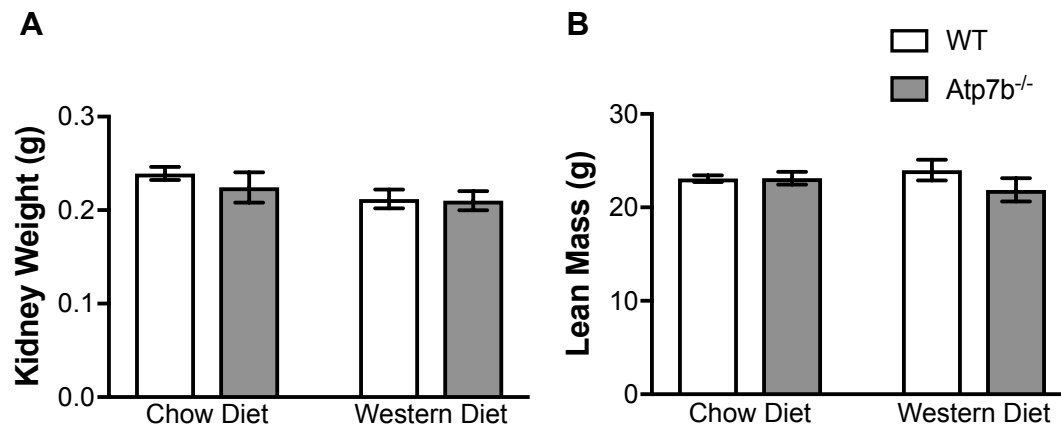

**Supplemental Figure 3. Global *Atp7b* deficiency does not affect lean body mass in mice.** (A) kidney or lean body (B) mass. N=5-11 per group.

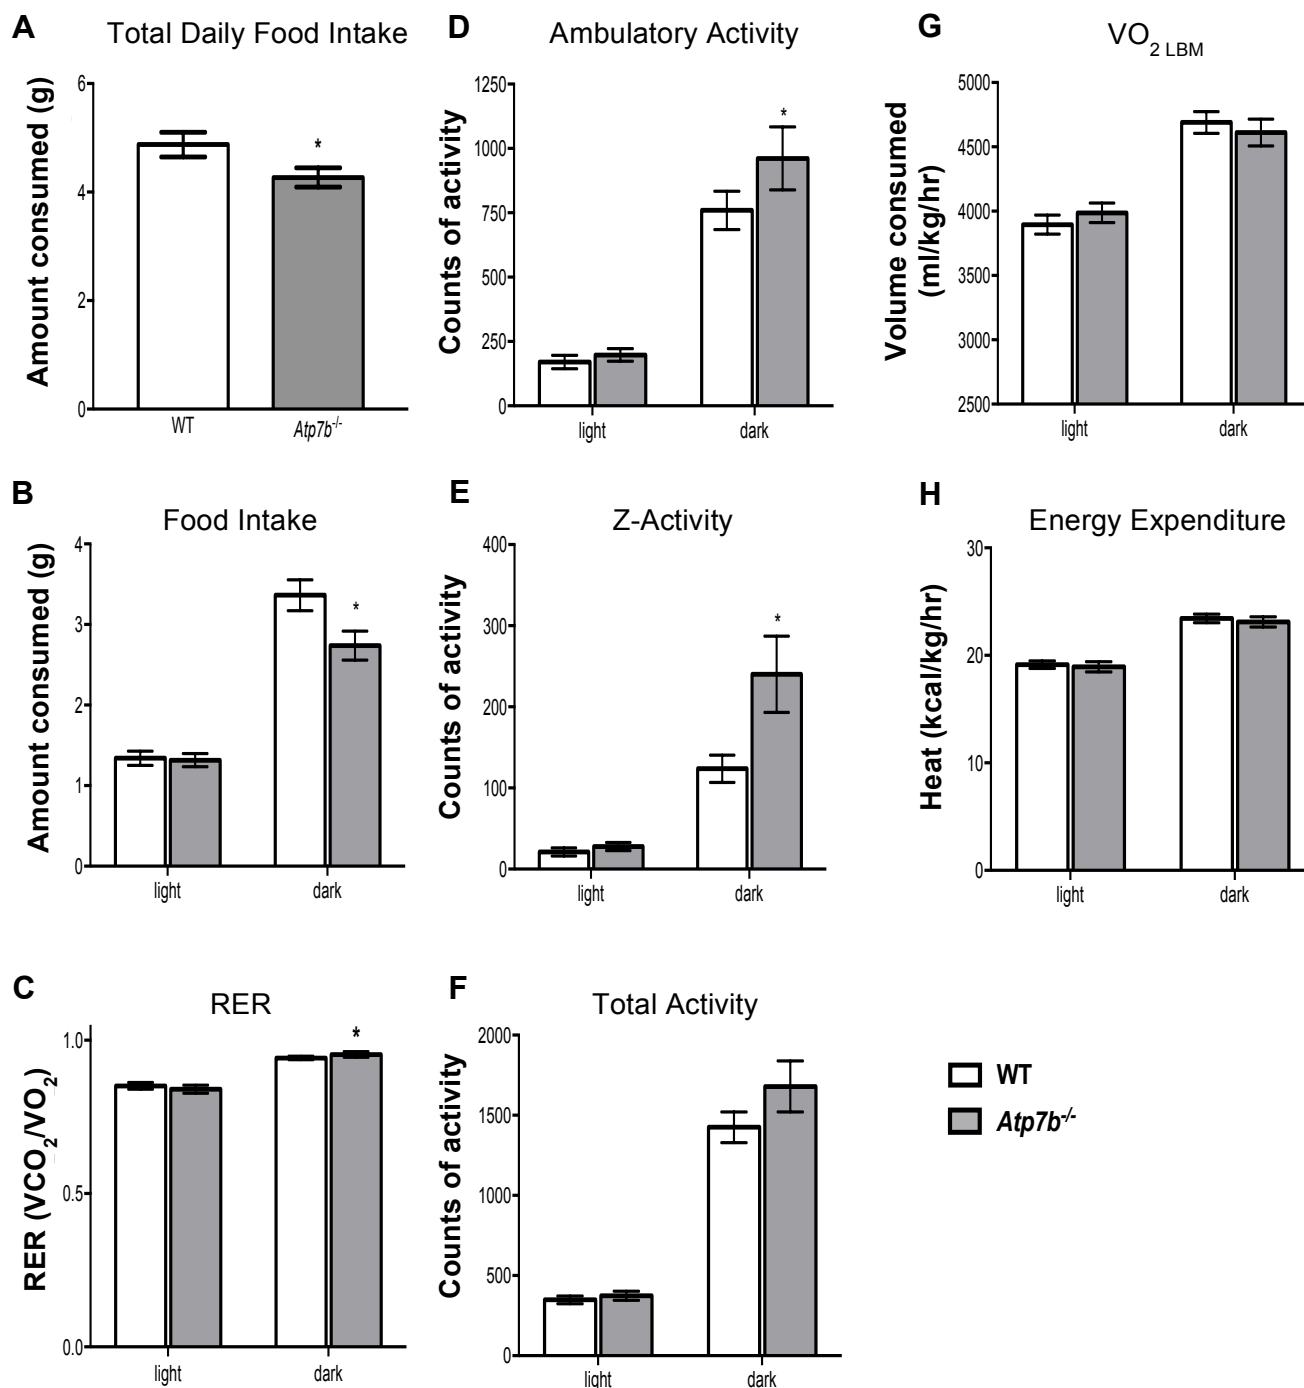

**Supplemental Figure 4. Indirect calorimetry, food intake, and activity in *Atp7b*<sup>-/-</sup> wild-type (WT) mice.** (A) Food intake, (B) total daily food intake, (C) respiratory exchange ratio (RER), (D) ambulatory activity, (E) Z-activity, (F) total activity, (G) VO<sub>2</sub> normalized to lean body mass, (H) and energy expenditure (heat) normalized to lean body mass were determined using Oxymax/CLAMS. Differences between *Atp7b*<sup>-/-</sup> vs. WT mice during either the light or dark cycle or between genotypes. \*P<0.05, Student's t-test, N=11 per group.

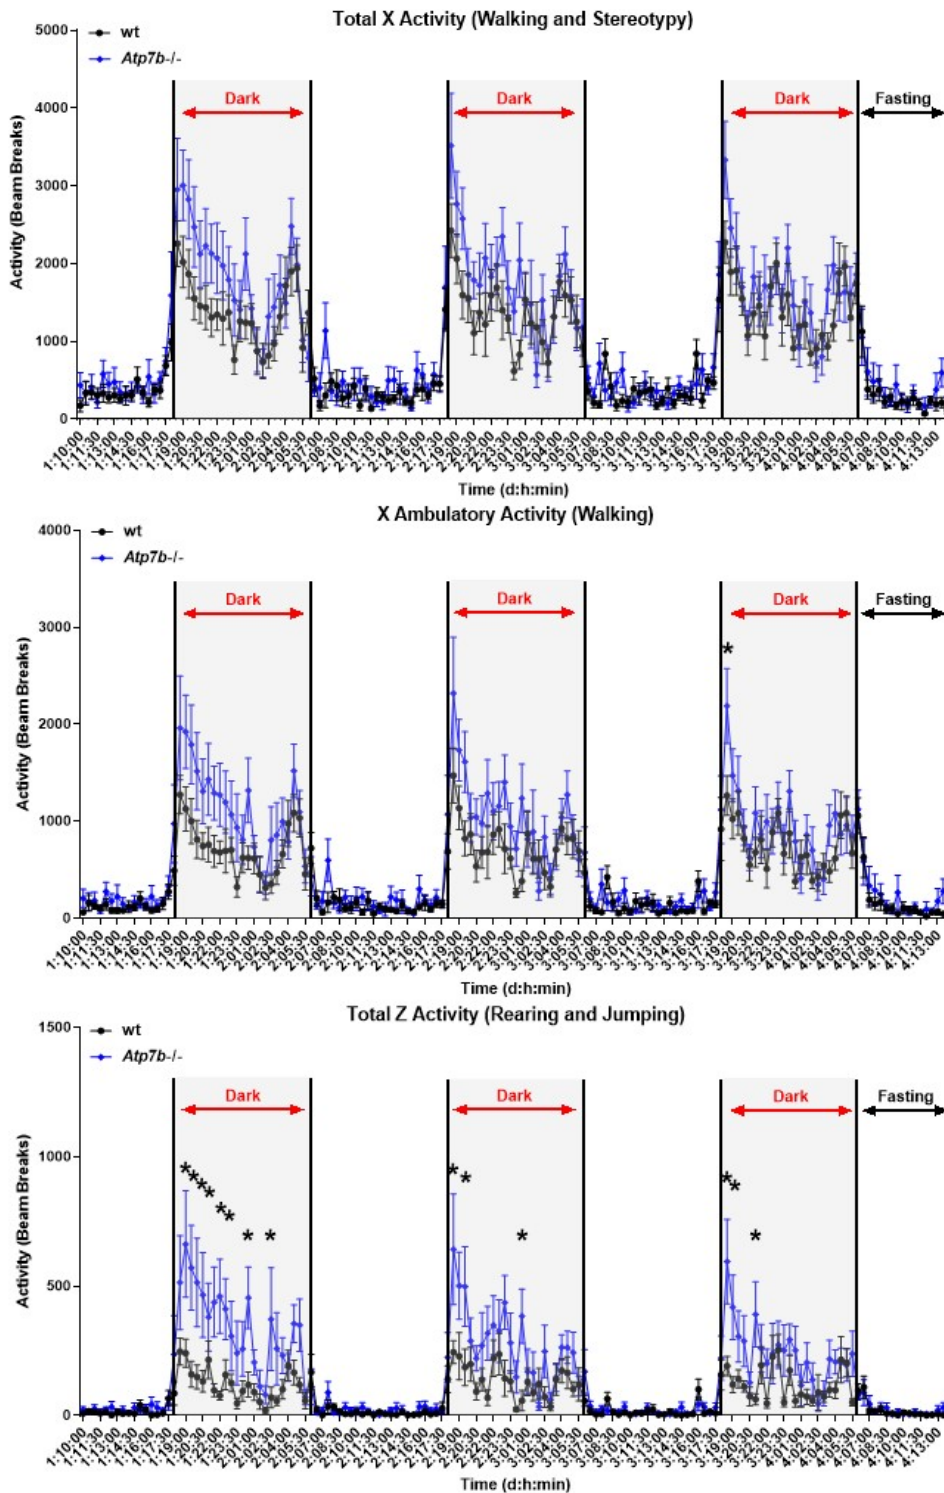

**Supplemental Figure 5. Activity vs time data reveal increased amplitude of X ambulatory and Z- activity during dark (active) cycle for *Atp7b*<sup>-/-</sup> mice in comparison with WT littermate controls.** Time-course data for the final 3 days of CLAMS/Oxymax experiments. \*P<0.05, *Atp7b*<sup>-/-</sup> vs WT, repeated-measures ANOVA, Sidak post-hoc test, N=11 per group.

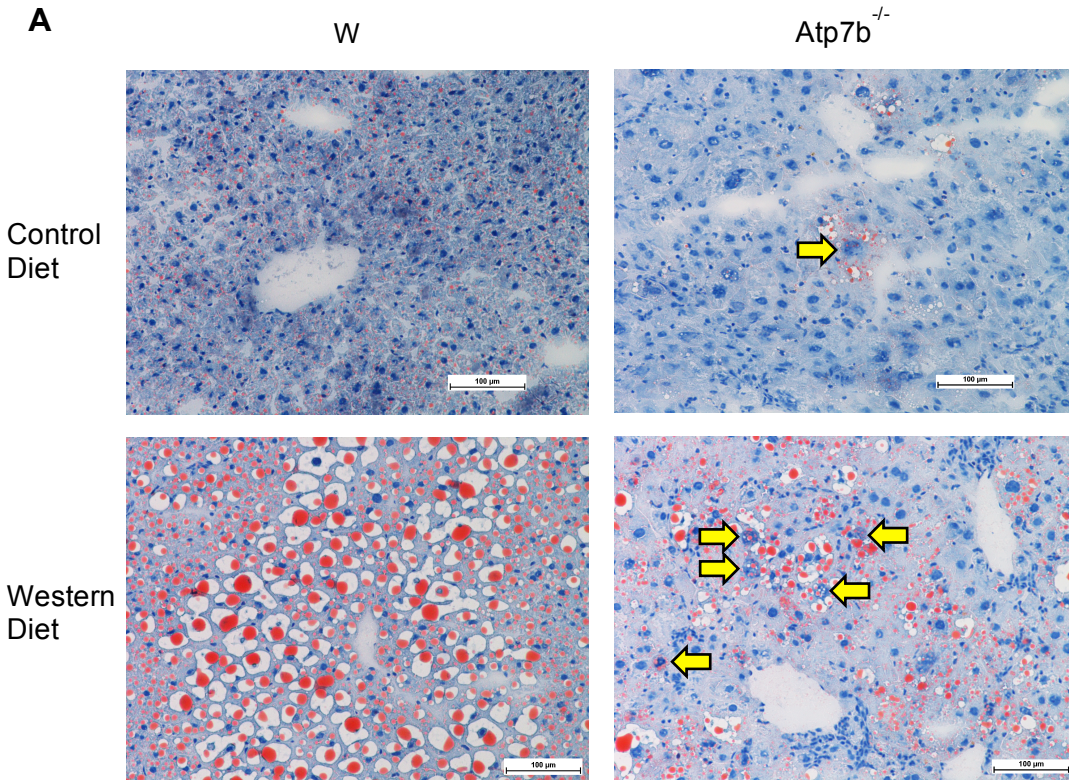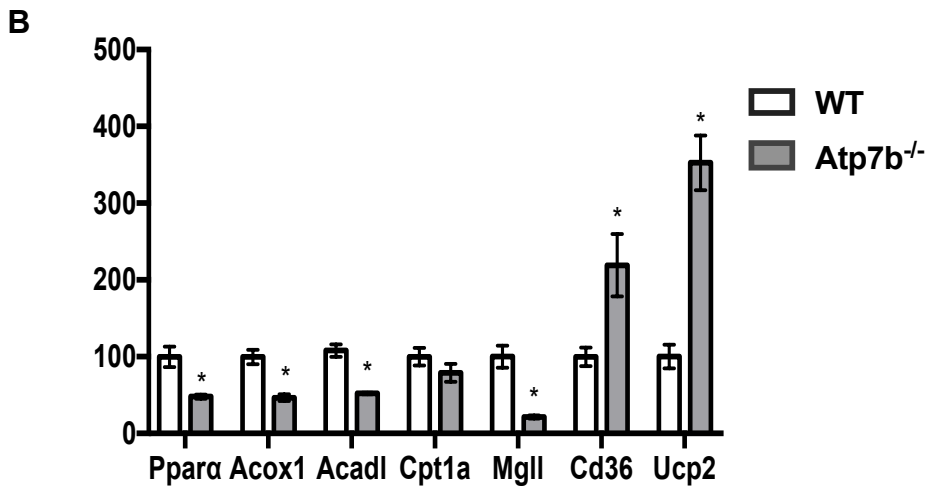

**Supplemental Figure 6. Hepatic lipid content is reduced in *Atp7b*<sup>-/-</sup> mice.** (A) Oil Red O (ORO) staining of Control (Chow) diet- vs Western diet-fed WT and *Atp7b*<sup>-/-</sup> livers. Black arrows - microsteatosis; yellow arrows - nuclei containing ORO staining. (B) Changes in hepatic fatty acid oxidation regulatory gene expression. N=5-11 mice per group. Student's t-test was used to determine differences between age-matched *Atp7b*<sup>-/-</sup> mice vs. WT controls, \* P<0.05 vs. WT.

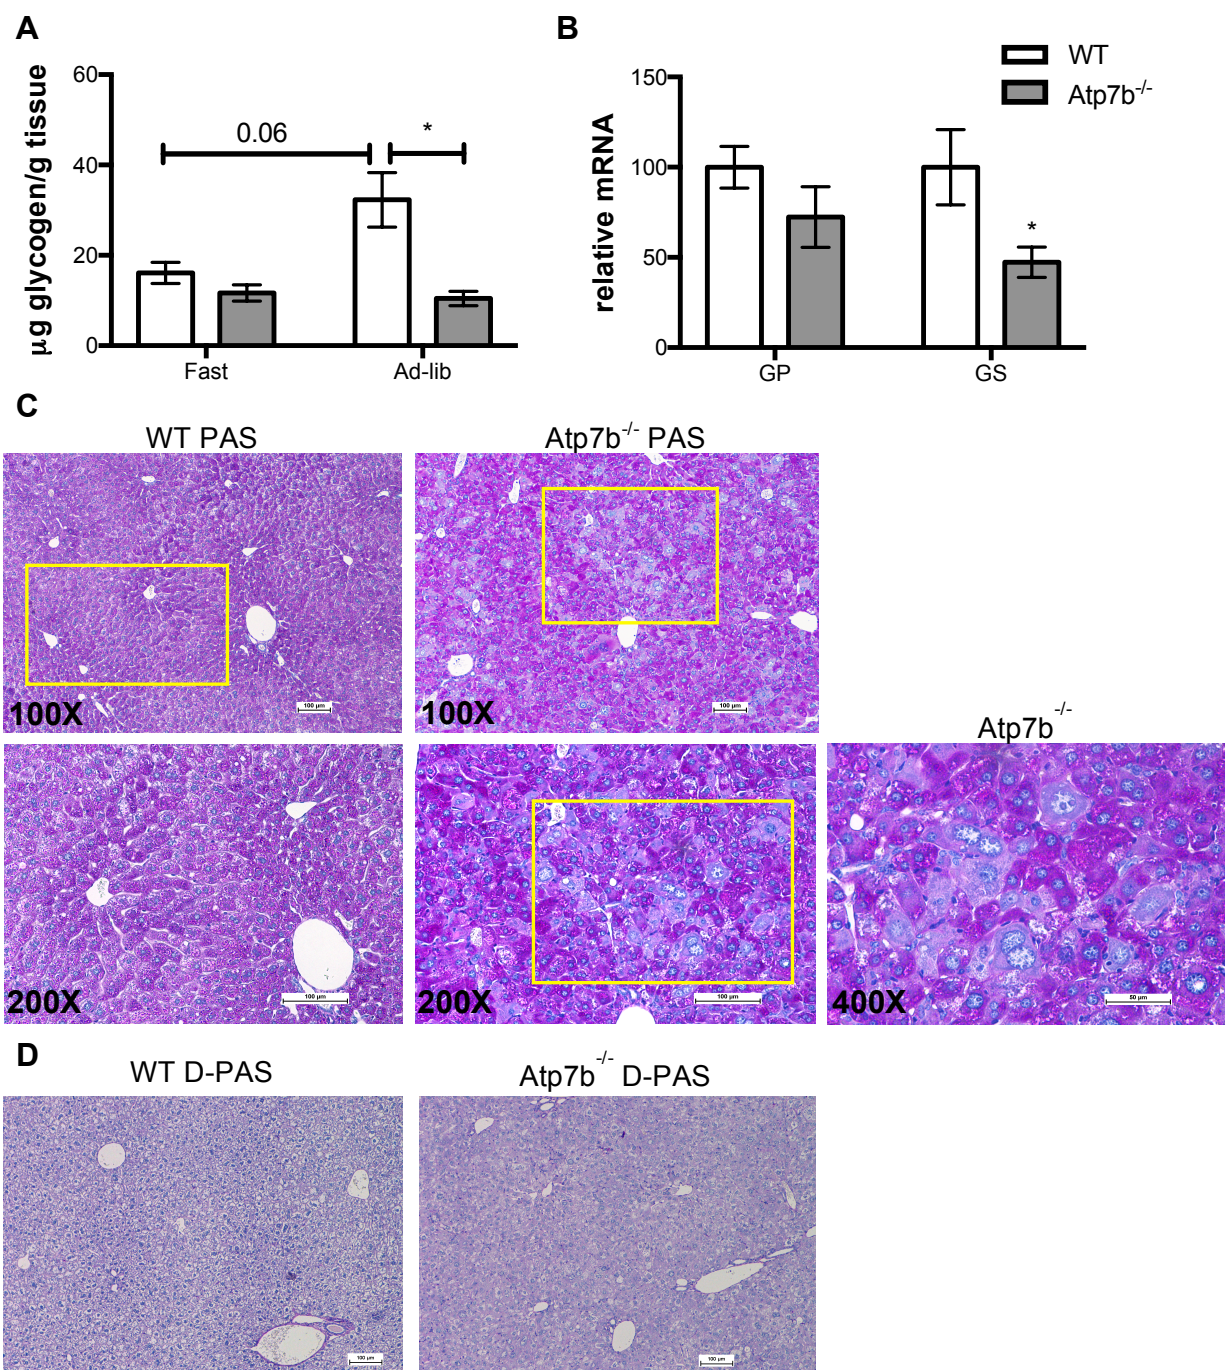

**Supplemental Figure 7. Hepatic glycogen content is decreased in *Atp7b*<sup>-/-</sup> mice.** (A) colorimetric glycogen assays in 4-6-month-old animals fasted for 6 hours or ad lib fed chow diet. (B) Real-time PCR analysis of GP – glycogen phosphatase, GS– glycogen synthetase mRNA for ad lib chow diet-fed 6-month-old *Atp7b*<sup>-/-</sup> mice and WT controls. (C) Glycogen content shown by PAS staining (D) D-PAS – digested negative control. Yellow boxes highlight low glycogen areas. Statistical analysis was performed by (A) Un-paired Student's t-test, \*P<0.05, n=5 mice per group, (B) 2-Way ANOVA, followed by Sidak's post-hoc test. \* P<0.05, WT vs. *Atp7b*<sup>-/-</sup>. N=4 mice per group.

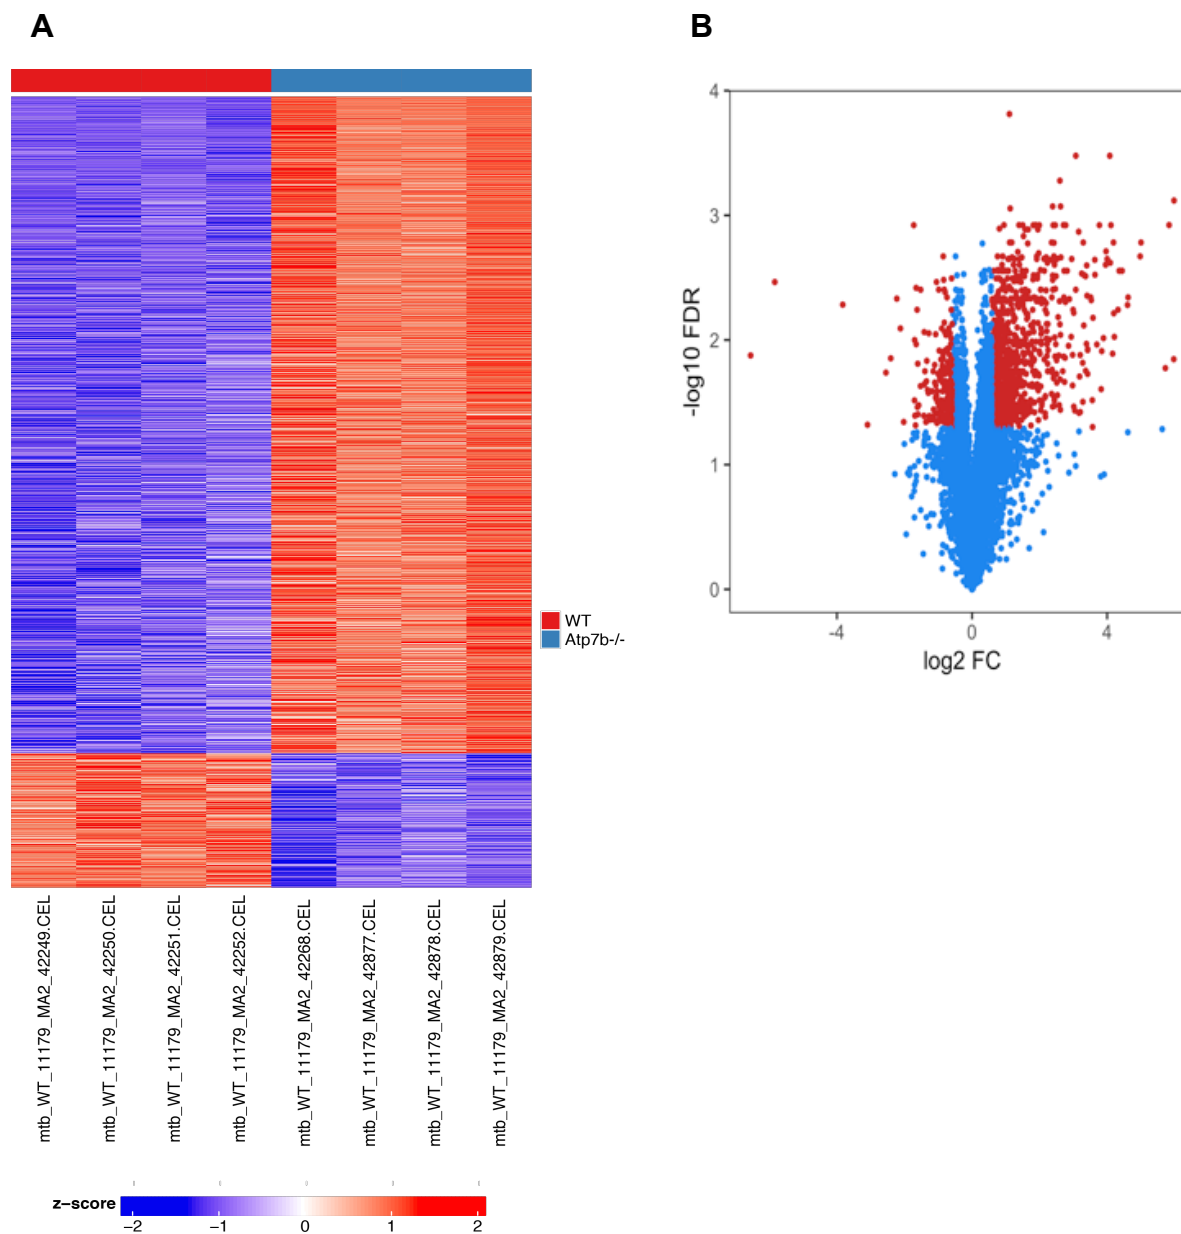

**Supplemental Figure 8. Microarray analysis of WT and *Atp7b*<sup>-/-</sup> livers.** (A) Heat map of significantly changed (FDR<0.05 and FC>1.5) genes. (B) Volcano plot visualizing the log<sub>2</sub> FC in gene expression in *Atp7b*<sup>-/-</sup> mice compared to WT controls. Statistically insignificant (FDR > 0.05) genes with a fold change less than 1.5 are in blue while significant (FDR < 0.05) genes with a fold change of 1.5 are in red.



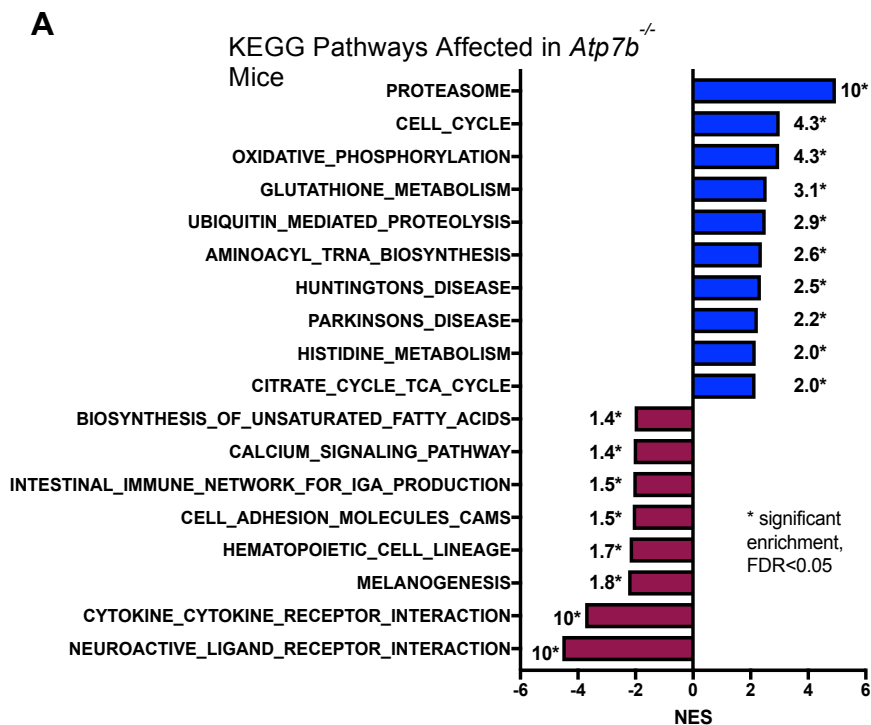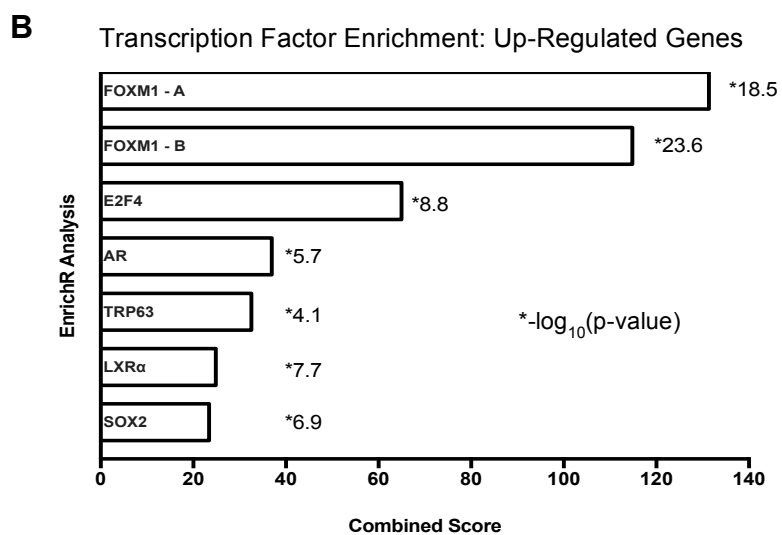

**Supplemental Figure 9. Transcriptomic analysis reveals pathways differentially regulated in *Atp7b*<sup>-/-</sup> liver.** (A) KEGG pathway analysis of significantly changed genes ( $F_c > 1.5$ ,  $FDR < 0.05$ ) from *Atp7b*<sup>-/-</sup> mouse microarray analysis. NES – network enrichment score. \* -  $\log_{10}(q\text{-value})$ . (B) Pathway analysis of transcription factor binding was performed with the microarray analysis genes ( $F_c > 1.5$ ,  $FDR < 0.05$ ) using the web based EnrichR platform (27141961). Binding sites identified from ChIP-Seq data within (B) up-regulated genes : FOXM1-A, FOXM1\_23109430\_ChIP-Seq\_U2OS\_Human; FOXM1 - B, FOXM1\_25889361\_ChIP-Seq\_OE33\_AND\_U2OS\_Human; E2F4\_17652178\_ChIP-ChIP\_JURKAT\_Human; AR(NR3C4)\_21909140\_ChIP-Seq\_LNCAP\_Human; TRP63\_18441228\_ChIP-ChIP\_KERATINOCYTES\_Mouse; LXR(NR1H3)\_22158963\_ChIP-Seq\_LIVER\_Mouse; SOX2\_27498859\_ChIP-Seq\_STOMACH\_Mouse.

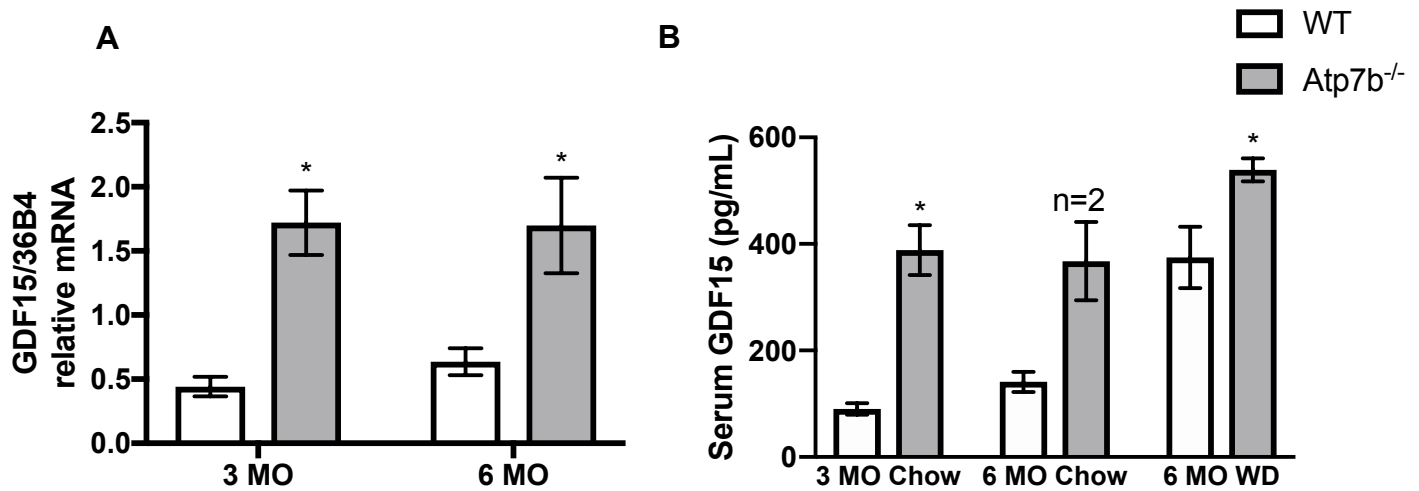

**Supplemental Figure 10. GDF15 is increased in *Atp7b*<sup>-/-</sup> mice fed either chow or Western diet.** (A) Hepatic *Gdf15* mRNA expression in chow, ad-lib fed wild-type (WT) and *Atp7b*<sup>-/-</sup> mice at 3 (3 MO) and 6 (6 MO) months of age. (B) Serum GDF15 concentrations in ad lib-fed 3- and 6-month-old WT and *Atp7b*<sup>-/-</sup> mice fed chow or Western diet (WD). n=3-6 per group, except for serum GDF15 measurement in 6 MO Chow *Atp7b*<sup>-/-</sup> mice, \**P*<0.05 as determined by Student's t-test for age-matched WT vs. *Atp7b*<sup>-/-</sup> mice. #*P*<0.05 as determined by 2-way ANOVA between 3-month-old or 6-month-old chow diet-fed WT mice vs 6-month-old Western diet-fed WT mice. Statistical analysis of serum GDF15 within the 6-month-old chow diet-fed cohort was not performed, because n=2 for *Atp7b*<sup>-/-</sup> mice in that age/diet group.

**Supplemental Table 1. Fold change of significantly changed mRNAs in *Atp7b*<sup>-/-</sup> mice (KO/WT)**

| Gene Symbol   | Fold Change | Log2 Fold Change | P Value | Q Value |
|---------------|-------------|------------------|---------|---------|
| 2410089E03Rik | 63.15       | 5.98081          | 0.00000 | 0.00076 |
| Esco2         | 62.83       | 5.97347          | 0.00040 | 0.01425 |
| Myom2         | 57.08       | 5.83486          | 0.00000 | 0.00120 |
| Mt2           | 52.89       | 5.72493          | 0.00057 | 0.01681 |
| Ddias         | 32.07       | 5.00326          | 0.00000 | 0.00165 |
| Shcbp1        | 31.50       | 4.97732          | 0.00000 | 0.00213 |
| Zwilch        | 24.60       | 4.62081          | 0.00004 | 0.00455 |
| Birc5         | 24.30       | 4.60308          | 0.00006 | 0.00524 |
| C330027C09Rik | 21.75       | 4.44264          | 0.00001 | 0.00279 |
| Ttk           | 20.51       | 4.35800          | 0.00001 | 0.00279 |
| Mbd1          | 20.00       | 4.32186          | 0.00006 | 0.00572 |
| Wfdc12        | 18.55       | 4.21334          | 0.00016 | 0.00944 |
| Ncapg         | 18.33       | 4.19611          | 0.00007 | 0.00611 |
| Cdca5         | 18.23       | 4.18797          | 0.00000 | 0.00165 |
| Gria3         | 17.89       | 4.16128          | 0.00032 | 0.01287 |
| A230058F20Rik | 17.30       | 4.11296          | 0.00000 | 0.00120 |
| Fam19a2       | 17.07       | 4.09342          | 0.00001 | 0.00240 |
| Smoc2         | 16.89       | 4.07830          | 0.00000 | 0.00033 |
| Ect2          | 16.01       | 4.00058          | 0.00001 | 0.00224 |
| Mad2l1        | 15.65       | 3.96798          | 0.00000 | 0.00194 |
| Cdc20         | 15.51       | 3.95468          | 0.00001 | 0.00249 |
| Mybl1         | 14.85       | 3.89221          | 0.00017 | 0.00966 |
| Kif20b        | 14.32       | 3.84039          | 0.00029 | 0.01228 |
| Rad51         | 14.15       | 3.82293          | 0.00132 | 0.02479 |
| Cep55         | 13.64       | 3.77020          | 0.00000 | 0.00120 |
| Trip13        | 12.95       | 3.69509          | 0.00023 | 0.01086 |
| Mis18bp1      | 12.47       | 3.63990          | 0.00001 | 0.00300 |
| Cenpw         | 12.42       | 3.63501          | 0.00001 | 0.00227 |
| Smc2          | 11.97       | 3.58149          | 0.00008 | 0.00664 |
| Sult1e1       | 11.87       | 3.56957          | 0.00597 | 0.04991 |
| Stap1         | 11.81       | 3.56178          | 0.00197 | 0.03039 |
| Arhgap11a     | 11.55       | 3.52937          | 0.00005 | 0.00479 |
| Cdkn1a        | 11.41       | 3.51254          | 0.00004 | 0.00455 |
| Robo1         | 10.74       | 3.42546          | 0.00027 | 0.01186 |
| Cenpp         | 10.72       | 3.42267          | 0.00028 | 0.01205 |

|               |       |         |         |         |
|---------------|-------|---------|---------|---------|
| Pls1          | 10.72 | 3.42222 | 0.00076 | 0.01872 |
| Spdl1         | 10.60 | 3.40533 | 0.00003 | 0.00441 |
| Cdk1          | 10.52 | 3.39513 | 0.00001 | 0.00252 |
| Lrp2          | 10.46 | 3.38745 | 0.00022 | 0.01074 |
| 2700099C18Rik | 10.30 | 3.36473 | 0.00063 | 0.01765 |
| Pbk           | 10.28 | 3.36157 | 0.00002 | 0.00308 |
| Asns          | 9.96  | 3.31616 | 0.00001 | 0.00301 |
| Cdca8         | 9.91  | 3.30939 | 0.00011 | 0.00765 |
| Ube2c         | 9.80  | 3.29330 | 0.00000 | 0.00165 |
| Bub1          | 9.72  | 3.28078 | 0.00211 | 0.03133 |
| Afp           | 9.69  | 3.27643 | 0.00047 | 0.01525 |
| BC021614      | 9.49  | 3.24702 | 0.00001 | 0.00293 |
| Ccdc11        | 9.21  | 3.20282 | 0.00330 | 0.03782 |
| Got111        | 9.20  | 3.20224 | 0.00033 | 0.01320 |
| Phlda3        | 9.09  | 3.18376 | 0.00082 | 0.01963 |
| LOC102635234  | 8.99  | 3.16858 | 0.00348 | 0.03842 |
| Tacc3         | 8.92  | 3.15714 | 0.00000 | 0.00135 |
| Cenpq         | 8.42  | 3.07311 | 0.00000 | 0.00033 |
| Spag5         | 8.41  | 3.07224 | 0.00003 | 0.00395 |
| Slc35f2       | 8.24  | 3.04323 | 0.00308 | 0.03680 |
| Calml4        | 8.07  | 3.01259 | 0.00262 | 0.03426 |
| Sgol2         | 8.06  | 3.01152 | 0.00007 | 0.00605 |
| Cyp2d12       | 7.95  | 2.99183 | 0.00006 | 0.00572 |
| Atp2b2        | 7.88  | 2.97788 | 0.00033 | 0.01318 |
| 2900046L07Rik | 7.87  | 2.97635 | 0.00115 | 0.02317 |
| Mis18a        | 7.73  | 2.95041 | 0.00001 | 0.00224 |
| Csf2rb        | 7.65  | 2.93567 | 0.00016 | 0.00943 |
| Cenpi         | 7.37  | 2.88130 | 0.00004 | 0.00470 |
| Racgap1       | 7.24  | 2.85643 | 0.00024 | 0.01113 |
| 2700094K13Rik | 7.04  | 2.81572 | 0.00001 | 0.00279 |
| Fancb         | 6.84  | 2.77325 | 0.00000 | 0.00120 |
| Ccdc18        | 6.80  | 2.76465 | 0.00005 | 0.00496 |
| Exoc4         | 6.75  | 2.75508 | 0.00038 | 0.01388 |
| Eda2r         | 6.67  | 2.73819 | 0.00099 | 0.02170 |
| Ska1          | 6.62  | 2.72760 | 0.00001 | 0.00279 |
| Cib3          | 6.59  | 2.71979 | 0.00004 | 0.00455 |
| Ifi2712b      | 6.56  | 2.71403 | 0.00036 | 0.01361 |
| Lin9          | 6.53  | 2.70671 | 0.00000 | 0.00120 |
| Mcm8          | 6.43  | 2.68540 | 0.00066 | 0.01780 |

|         |      |         |         |         |
|---------|------|---------|---------|---------|
| Smim22  | 6.19 | 2.63022 | 0.00001 | 0.00217 |
| Gsg2    | 6.15 | 2.62171 | 0.00000 | 0.00085 |
| Lin54   | 6.14 | 2.61853 | 0.00015 | 0.00909 |
| Tff3    | 6.13 | 2.61484 | 0.00296 | 0.03631 |
| Kif11   | 6.09 | 2.60527 | 0.00090 | 0.02071 |
| Lrp11   | 6.07 | 2.60159 | 0.00010 | 0.00749 |
| Ndc1    | 6.07 | 2.60056 | 0.00000 | 0.00053 |
| Ccng1   | 6.02 | 2.59096 | 0.00005 | 0.00488 |
| Psrc1   | 5.98 | 2.58074 | 0.00241 | 0.03332 |
| Grk5    | 5.93 | 2.56838 | 0.00034 | 0.01333 |
| Stil    | 5.85 | 2.54947 | 0.00008 | 0.00655 |
| Spc25   | 5.77 | 2.52854 | 0.00164 | 0.02771 |
| Sass6   | 5.72 | 2.51676 | 0.00001 | 0.00223 |
| Olig1   | 5.69 | 2.50829 | 0.00101 | 0.02198 |
| Sgol1   | 5.67 | 2.50407 | 0.00043 | 0.01454 |
| Oip5    | 5.66 | 2.50032 | 0.00076 | 0.01872 |
| Smc4    | 5.61 | 2.48737 | 0.00002 | 0.00308 |
| Gdf15   | 5.58 | 2.47962 | 0.00023 | 0.01081 |
| Brca1   | 5.52 | 2.46497 | 0.00003 | 0.00389 |
| Plk4    | 5.52 | 2.46338 | 0.00000 | 0.00120 |
| Nusap1  | 5.49 | 2.45666 | 0.00035 | 0.01357 |
| Rpp40   | 5.45 | 2.44608 | 0.00017 | 0.00954 |
| Dbf4    | 5.43 | 2.44115 | 0.00001 | 0.00249 |
| Malat1  | 5.42 | 2.43814 | 0.00200 | 0.03051 |
| Slc37a2 | 5.41 | 2.43570 | 0.00001 | 0.00240 |
| Gpx6    | 5.40 | 2.43218 | 0.00252 | 0.03380 |
| Kif22   | 5.38 | 2.42854 | 0.00175 | 0.02857 |
| Kif18a  | 5.37 | 2.42492 | 0.00000 | 0.00166 |
| Cenpa   | 5.36 | 2.42350 | 0.00000 | 0.00213 |
| Anln    | 5.32 | 2.41200 | 0.00087 | 0.02024 |
| Aaas    | 5.29 | 2.40334 | 0.00000 | 0.00120 |
| Dntt    | 5.25 | 2.39268 | 0.00003 | 0.00395 |
| Ier5    | 5.24 | 2.38923 | 0.00002 | 0.00330 |
| Adrb3   | 5.23 | 2.38809 | 0.00002 | 0.00304 |
| Suv39h1 | 5.23 | 2.38759 | 0.00000 | 0.00085 |
| Mkl1    | 5.23 | 2.38559 | 0.00260 | 0.03420 |
| Lipo1   | 5.20 | 2.37885 | 0.00071 | 0.01827 |
| Cdca3   | 5.17 | 2.37047 | 0.00060 | 0.01731 |
| Btg2    | 5.14 | 2.36233 | 0.00004 | 0.00455 |

|               |      |         |         |         |
|---------------|------|---------|---------|---------|
| Ckap2         | 5.12 | 2.35650 | 0.00158 | 0.02705 |
| Spc24         | 5.12 | 2.35561 | 0.00000 | 0.00165 |
| Kifc1         | 4.94 | 2.30432 | 0.00001 | 0.00227 |
| Ccdc34        | 4.90 | 2.29297 | 0.00018 | 0.00990 |
| Sulf2         | 4.76 | 2.25178 | 0.00028 | 0.01206 |
| Lpl           | 4.73 | 2.24325 | 0.00010 | 0.00745 |
| Fmn2          | 4.73 | 2.24115 | 0.00067 | 0.01780 |
| 1700007K13Rik | 4.72 | 2.23737 | 0.00049 | 0.01550 |
| Camk2n2       | 4.69 | 2.23044 | 0.00001 | 0.00240 |
| Parpbp        | 4.67 | 2.22435 | 0.00022 | 0.01074 |
| Spink5        | 4.66 | 2.21975 | 0.00022 | 0.01081 |
| BC022960      | 4.65 | 2.21846 | 0.00035 | 0.01341 |
| Mtmr7         | 4.63 | 2.21073 | 0.00013 | 0.00847 |
| Neb           | 4.63 | 2.21031 | 0.00007 | 0.00610 |
| Slc16a5       | 4.61 | 2.20475 | 0.00010 | 0.00745 |
| Trp53inp1     | 4.59 | 2.19938 | 0.00017 | 0.00975 |
| Nek2          | 4.58 | 2.19612 | 0.00001 | 0.00217 |
| Dis3l2        | 4.57 | 2.19344 | 0.00005 | 0.00506 |
| Ncapg2        | 4.57 | 2.19079 | 0.00003 | 0.00400 |
| Ddit4l        | 4.50 | 2.17025 | 0.00171 | 0.02818 |
| Treh          | 4.50 | 2.17010 | 0.00407 | 0.04133 |
| Pkhd1         | 4.49 | 2.16657 | 0.00006 | 0.00572 |
| Gadd45g       | 4.48 | 2.16441 | 0.00352 | 0.03867 |
| Cd36          | 4.46 | 2.15621 | 0.00180 | 0.02895 |
| 2900009J06Rik | 4.41 | 2.13962 | 0.00041 | 0.01431 |
| Mnd1          | 4.40 | 2.13902 | 0.00001 | 0.00279 |
| Ube2t         | 4.38 | 2.12988 | 0.00005 | 0.00479 |
| Ccdc77        | 4.38 | 2.12941 | 0.00001 | 0.00223 |
| Armc8         | 4.20 | 2.07160 | 0.00223 | 0.03189 |
| Hmnr          | 4.18 | 2.06440 | 0.00244 | 0.03345 |
| Knstrn        | 4.16 | 2.05828 | 0.00005 | 0.00506 |
| Top2a         | 4.15 | 2.05383 | 0.00014 | 0.00883 |
| Plk2          | 4.14 | 2.04960 | 0.00022 | 0.01074 |
| Ces2e         | 4.14 | 2.04930 | 0.00004 | 0.00466 |
| Chek2         | 4.12 | 2.04335 | 0.00015 | 0.00892 |
| Trim68        | 4.11 | 2.04079 | 0.00003 | 0.00395 |
| Aurka         | 4.11 | 2.03997 | 0.00012 | 0.00808 |
| Klk1b4        | 4.11 | 2.03816 | 0.00019 | 0.01020 |
| Klhl13        | 4.10 | 2.03515 | 0.00119 | 0.02354 |

|               |      |         |         |         |
|---------------|------|---------|---------|---------|
| Dkk4          | 4.10 | 2.03451 | 0.00304 | 0.03664 |
| Poc1a         | 4.08 | 2.02727 | 0.00003 | 0.00395 |
| Rad54b        | 4.07 | 2.02622 | 0.00001 | 0.00274 |
| Cenpm         | 4.03 | 2.01127 | 0.00032 | 0.01290 |
| Cdcp1         | 4.00 | 2.00012 | 0.00199 | 0.03044 |
| Spidr         | 3.98 | 1.99365 | 0.00029 | 0.01235 |
| Rsph3a        | 3.98 | 1.99168 | 0.00000 | 0.00120 |
| Sybu          | 3.96 | 1.98465 | 0.00080 | 0.01932 |
| Ndc80         | 3.93 | 1.97284 | 0.00000 | 0.00201 |
| Zfp36         | 3.91 | 1.96596 | 0.00466 | 0.04385 |
| Bub1b         | 3.90 | 1.96259 | 0.00076 | 0.01872 |
| Mterfd3       | 3.89 | 1.96071 | 0.00138 | 0.02536 |
| 4933438K21Rik | 3.87 | 1.95384 | 0.00010 | 0.00731 |
| Tpx2          | 3.86 | 1.94938 | 0.00000 | 0.00130 |
| Gtse1         | 3.83 | 1.93853 | 0.00005 | 0.00488 |
| Fam83f        | 3.83 | 1.93732 | 0.00001 | 0.00301 |
| Aldh1b1       | 3.82 | 1.93314 | 0.00002 | 0.00321 |
| Fam53b        | 3.81 | 1.93012 | 0.00002 | 0.00307 |
| McpH1         | 3.81 | 1.92939 | 0.00109 | 0.02267 |
| A830010M20Rik | 3.78 | 1.91854 | 0.00127 | 0.02412 |
| Zak           | 3.77 | 1.91573 | 0.00001 | 0.00224 |
| C4bp-ps1      | 3.77 | 1.91534 | 0.00000 | 0.00213 |
| Lrr1          | 3.76 | 1.91011 | 0.00005 | 0.00488 |
| Ncaph         | 3.72 | 1.89610 | 0.00020 | 0.01032 |
| Tstd1         | 3.71 | 1.89319 | 0.00004 | 0.00462 |
| Ocel1         | 3.70 | 1.88765 | 0.00000 | 0.00120 |
| 9130409I23Rik | 3.67 | 1.87674 | 0.00066 | 0.01780 |
| Fam72a        | 3.67 | 1.87553 | 0.00000 | 0.00120 |
| Nuf2          | 3.63 | 1.85802 | 0.00078 | 0.01911 |
| Ttc39a        | 3.61 | 1.85037 | 0.00335 | 0.03804 |
| Gngt1         | 3.60 | 1.84761 | 0.00218 | 0.03170 |
| Dsn1          | 3.59 | 1.84543 | 0.00026 | 0.01179 |
| Mastl         | 3.59 | 1.84257 | 0.00041 | 0.01431 |
| Exo1          | 3.57 | 1.83437 | 0.00004 | 0.00455 |
| Lamb3         | 3.56 | 1.83011 | 0.00043 | 0.01465 |
| Incenp        | 3.55 | 1.82670 | 0.00013 | 0.00858 |
| Zfp458        | 3.54 | 1.82271 | 0.00010 | 0.00725 |
| A530020G20Rik | 3.53 | 1.81982 | 0.00001 | 0.00303 |
| Aen           | 3.52 | 1.81415 | 0.00000 | 0.00120 |

|               |      |         |         |         |
|---------------|------|---------|---------|---------|
| Aspm          | 3.49 | 1.80520 | 0.00002 | 0.00326 |
| Snhg11        | 3.48 | 1.79994 | 0.00067 | 0.01780 |
| Dnaic1        | 3.48 | 1.79767 | 0.00111 | 0.02293 |
| Tmem237       | 3.47 | 1.79490 | 0.00006 | 0.00572 |
| Trdmt1        | 3.46 | 1.79134 | 0.00012 | 0.00795 |
| Hexb          | 3.44 | 1.78077 | 0.00119 | 0.02354 |
| Acnat2        | 3.44 | 1.78053 | 0.00108 | 0.02263 |
| Smyd1         | 3.43 | 1.77619 | 0.00037 | 0.01374 |
| Arsg          | 3.42 | 1.77398 | 0.00020 | 0.01028 |
| Apaf1         | 3.38 | 1.75567 | 0.00052 | 0.01585 |
| Tube1         | 3.37 | 1.75395 | 0.00022 | 0.01074 |
| Haus5         | 3.35 | 1.74601 | 0.00032 | 0.01301 |
| Cep128        | 3.35 | 1.74316 | 0.00565 | 0.04847 |
| Ska3          | 3.34 | 1.73980 | 0.00011 | 0.00765 |
| Tdrkh         | 3.32 | 1.73260 | 0.00004 | 0.00464 |
| Nqo1          | 3.32 | 1.73259 | 0.00194 | 0.03027 |
| Tmprss2       | 3.32 | 1.72967 | 0.00299 | 0.03643 |
| Atp6v0d2      | 3.28 | 1.71428 | 0.00247 | 0.03355 |
| Atr           | 3.27 | 1.70818 | 0.00326 | 0.03764 |
| 2610028L16Rik | 3.26 | 1.70316 | 0.00047 | 0.01518 |
| Agpat9        | 3.23 | 1.69115 | 0.00114 | 0.02315 |
| Morc4         | 3.22 | 1.68857 | 0.00014 | 0.00883 |
| Tmem184c      | 3.19 | 1.67399 | 0.00023 | 0.01093 |
| Polk          | 3.17 | 1.66580 | 0.00003 | 0.00407 |
| Rbp1          | 3.17 | 1.66578 | 0.00030 | 0.01244 |
| Endog         | 3.16 | 1.66147 | 0.00000 | 0.00130 |
| Car2          | 3.13 | 1.64830 | 0.00000 | 0.00168 |
| 2610020H08Rik | 3.13 | 1.64677 | 0.00004 | 0.00455 |
| Gm13139       | 3.13 | 1.64551 | 0.00025 | 0.01135 |
| Mgst3         | 3.13 | 1.64547 | 0.00008 | 0.00659 |
| 9030617O03Rik | 3.13 | 1.64481 | 0.00008 | 0.00620 |
| Zranb3        | 3.12 | 1.63961 | 0.00024 | 0.01123 |
| 5033406O09Rik | 3.10 | 1.63016 | 0.00004 | 0.00464 |
| Hamp2         | 3.09 | 1.62805 | 0.00360 | 0.03918 |
| Ercc6l        | 3.08 | 1.62324 | 0.00009 | 0.00678 |
| S100a10       | 3.07 | 1.61721 | 0.00266 | 0.03449 |
| Blnk          | 3.06 | 1.61124 | 0.00318 | 0.03729 |
| Hltf          | 3.04 | 1.60602 | 0.00046 | 0.01501 |
| Phip          | 3.04 | 1.60289 | 0.00007 | 0.00610 |



|           |      |         |         |         |
|-----------|------|---------|---------|---------|
| Depdc1b   | 3.03 | 1.60161 | 0.00075 | 0.01870 |
| Cyp2g1    | 3.03 | 1.60143 | 0.00341 | 0.03825 |
| Htati2    | 3.03 | 1.59722 | 0.00001 | 0.00279 |
| LOC624295 | 3.00 | 1.58556 | 0.00017 | 0.00975 |
| Nipal1    | 2.99 | 1.57938 | 0.00213 | 0.03134 |
| Cep192    | 2.98 | 1.57708 | 0.00003 | 0.00395 |
| Tm6sf2    | 2.97 | 1.57284 | 0.00000 | 0.00130 |
| Lsm3      | 2.97 | 1.57079 | 0.00003 | 0.00414 |
| Erc2      | 2.97 | 1.56875 | 0.00049 | 0.01548 |
| Tert      | 2.96 | 1.56488 | 0.00023 | 0.01086 |
| Nt5e      | 2.95 | 1.55908 | 0.00046 | 0.01501 |
| Emp2      | 2.95 | 1.55877 | 0.00248 | 0.03357 |
| D7Ert715e | 2.95 | 1.55862 | 0.00156 | 0.02693 |
| Gtdc1     | 2.94 | 1.55360 | 0.00210 | 0.03114 |
| Gstm3     | 2.93 | 1.55299 | 0.00102 | 0.02206 |
| Rad18     | 2.93 | 1.55205 | 0.00397 | 0.04084 |
| Tmem120a  | 2.93 | 1.55112 | 0.00002 | 0.00308 |
| Nup133    | 2.93 | 1.54985 | 0.00015 | 0.00892 |
| Psmb9     | 2.93 | 1.54936 | 0.00006 | 0.00572 |
| Inadl     | 2.92 | 1.54799 | 0.00020 | 0.01037 |
| Eppk1     | 2.92 | 1.54727 | 0.00331 | 0.03786 |
| Ccdc120   | 2.91 | 1.54013 | 0.00034 | 0.01321 |
| Cdk5rap2  | 2.88 | 1.52648 | 0.00004 | 0.00476 |
| Gle1      | 2.87 | 1.52258 | 0.00000 | 0.00147 |
| Cyp4f16   | 2.85 | 1.51244 | 0.00013 | 0.00860 |
| Mdm2      | 2.85 | 1.51176 | 0.00030 | 0.01264 |
| Clic5     | 2.85 | 1.51164 | 0.00114 | 0.02315 |
| Gen1      | 2.85 | 1.51128 | 0.00019 | 0.01028 |
| Atad2     | 2.85 | 1.51087 | 0.00067 | 0.01782 |
| Adck4     | 2.85 | 1.50922 | 0.00113 | 0.02315 |
| Haus6     | 2.85 | 1.50900 | 0.00013 | 0.00863 |
| Rian      | 2.84 | 1.50825 | 0.00356 | 0.03887 |
| Espl1     | 2.84 | 1.50815 | 0.00006 | 0.00521 |
| Ccdc163   | 2.84 | 1.50557 | 0.00012 | 0.00824 |
| Senp7     | 2.83 | 1.50272 | 0.00069 | 0.01821 |
| Ctps2     | 2.83 | 1.50142 | 0.00004 | 0.00455 |
| Lrriq3    | 2.83 | 1.50031 | 0.00000 | 0.00120 |
| Esr1      | 2.82 | 1.49482 | 0.00315 | 0.03723 |
| Pxylp1    | 2.81 | 1.49152 | 0.00021 | 0.01064 |

|               |      |         |         |         |
|---------------|------|---------|---------|---------|
| Aldh2         | 2.81 | 1.49064 | 0.00019 | 0.01028 |
| Mkxn1         | 2.81 | 1.48810 | 0.00275 | 0.03498 |
| Traip         | 2.80 | 1.48326 | 0.00001 | 0.00297 |
| Cnot7         | 2.78 | 1.47702 | 0.00045 | 0.01480 |
| Preli2        | 2.78 | 1.47636 | 0.00001 | 0.00279 |
| Scamp5        | 2.78 | 1.47443 | 0.00001 | 0.00217 |
| Asf1b         | 2.77 | 1.47153 | 0.00003 | 0.00400 |
| Atp8b4        | 2.77 | 1.47113 | 0.00456 | 0.04356 |
| Tmem71        | 2.77 | 1.46906 | 0.00116 | 0.02332 |
| Tfrc          | 2.77 | 1.46855 | 0.00176 | 0.02861 |
| Ppl           | 2.74 | 1.45319 | 0.00103 | 0.02214 |
| Itih5         | 2.73 | 1.45015 | 0.00002 | 0.00307 |
| Eri2          | 2.73 | 1.44921 | 0.00002 | 0.00343 |
| Cdca2         | 2.72 | 1.44413 | 0.00093 | 0.02104 |
| Col5a3        | 2.70 | 1.43262 | 0.00254 | 0.03382 |
| Ddit4         | 2.69 | 1.42960 | 0.00024 | 0.01115 |
| Cenpe         | 2.68 | 1.42416 | 0.00201 | 0.03051 |
| Gca           | 2.66 | 1.41166 | 0.00066 | 0.01780 |
| Wwtr1         | 2.65 | 1.40855 | 0.00064 | 0.01778 |
| Nek3          | 2.64 | 1.40262 | 0.00001 | 0.00249 |
| Il17rb        | 2.64 | 1.40049 | 0.00019 | 0.01028 |
| Tob2          | 2.64 | 1.39914 | 0.00294 | 0.03618 |
| Snrnp25       | 2.63 | 1.39528 | 0.00082 | 0.01963 |
| Kif4          | 2.63 | 1.39422 | 0.00001 | 0.00224 |
| Hist1h1c      | 2.63 | 1.39388 | 0.00571 | 0.04881 |
| Zfp101        | 2.62 | 1.39056 | 0.00002 | 0.00316 |
| Lsm2          | 2.62 | 1.38983 | 0.00000 | 0.00120 |
| Neat1         | 2.61 | 1.38455 | 0.00098 | 0.02170 |
| Vrk1          | 2.61 | 1.38241 | 0.00005 | 0.00488 |
| Sult1b1       | 2.61 | 1.38211 | 0.00075 | 0.01870 |
| Col12a1       | 2.61 | 1.38198 | 0.00020 | 0.01037 |
| Mtss1         | 2.60 | 1.38015 | 0.00477 | 0.04444 |
| Pir           | 2.60 | 1.37720 | 0.00006 | 0.00546 |
| Ptpdc1        | 2.60 | 1.37652 | 0.00275 | 0.03498 |
| 2810408I11Rik | 2.58 | 1.36954 | 0.00047 | 0.01515 |
| Wdpcp         | 2.58 | 1.36466 | 0.00332 | 0.03789 |
| Fam32a        | 2.57 | 1.36261 | 0.00074 | 0.01867 |
| G2e3          | 2.57 | 1.35924 | 0.00024 | 0.01113 |
| Gsta2         | 2.56 | 1.35868 | 0.00022 | 0.01074 |

|               |      |         |         |         |
|---------------|------|---------|---------|---------|
| Cenpn         | 2.56 | 1.35820 | 0.00035 | 0.01357 |
| Mgat5         | 2.56 | 1.35517 | 0.00000 | 0.00197 |
| Srxn1         | 2.55 | 1.35224 | 0.00069 | 0.01821 |
| Alg13         | 2.54 | 1.34711 | 0.00002 | 0.00335 |
| Hr            | 2.54 | 1.34594 | 0.00493 | 0.04523 |
| Ints10        | 2.53 | 1.34097 | 0.00294 | 0.03618 |
| Eid1          | 2.53 | 1.33737 | 0.00011 | 0.00794 |
| 5830418K08Rik | 2.52 | 1.33500 | 0.00005 | 0.00521 |
| Sema4f        | 2.52 | 1.33191 | 0.00434 | 0.04260 |
| Tmem43        | 2.52 | 1.33074 | 0.00125 | 0.02406 |
| Zfp54         | 2.51 | 1.32771 | 0.00019 | 0.01028 |
| Ablim1        | 2.51 | 1.32721 | 0.00157 | 0.02701 |
| Fam122b       | 2.51 | 1.32509 | 0.00004 | 0.00455 |
| Mbl2          | 2.50 | 1.31948 | 0.00017 | 0.00966 |
| Srbd1         | 2.49 | 1.31801 | 0.00002 | 0.00320 |
| Thns12        | 2.49 | 1.31557 | 0.00002 | 0.00307 |
| Figf          | 2.49 | 1.31417 | 0.00050 | 0.01561 |
| Tctex1d2      | 2.49 | 1.31407 | 0.00238 | 0.03313 |
| Lrrc40        | 2.48 | 1.31322 | 0.00067 | 0.01782 |
| Ano10         | 2.47 | 1.30656 | 0.00030 | 0.01244 |
| Rev1          | 2.47 | 1.30642 | 0.00043 | 0.01454 |
| Rsrc1         | 2.46 | 1.29977 | 0.00003 | 0.00414 |
| Cenpl         | 2.45 | 1.29524 | 0.00404 | 0.04113 |
| Prc1          | 2.45 | 1.29512 | 0.00058 | 0.01703 |
| Pdgfa         | 2.45 | 1.29241 | 0.00038 | 0.01396 |
| Smpd3         | 2.44 | 1.28977 | 0.00031 | 0.01271 |
| 4930526I15Rik | 2.44 | 1.28946 | 0.00114 | 0.02315 |
| Sgsm1         | 2.44 | 1.28582 | 0.00299 | 0.03643 |
| Xrcc4         | 2.43 | 1.28386 | 0.00289 | 0.03599 |
| BC052040      | 2.43 | 1.28221 | 0.00016 | 0.00928 |
| Aebp2         | 2.43 | 1.28210 | 0.00017 | 0.00980 |
| Notch1        | 2.43 | 1.27918 | 0.00001 | 0.00279 |
| Gm2a          | 2.42 | 1.27348 | 0.00008 | 0.00668 |
| Zfp868        | 2.42 | 1.27315 | 0.00042 | 0.01445 |
| Plxnb1        | 2.41 | 1.26644 | 0.00031 | 0.01269 |
| Mmd2          | 2.40 | 1.26289 | 0.00090 | 0.02071 |
| Nipal3        | 2.40 | 1.26217 | 0.00458 | 0.04357 |
| Micu2         | 2.39 | 1.25902 | 0.00001 | 0.00224 |
| Abhd10        | 2.39 | 1.25703 | 0.00015 | 0.00912 |

|               |      |         |         |         |
|---------------|------|---------|---------|---------|
| Kif18b        | 2.39 | 1.25686 | 0.00274 | 0.03498 |
| Zap70         | 2.39 | 1.25645 | 0.00004 | 0.00462 |
| Rps4l         | 2.39 | 1.25570 | 0.00036 | 0.01373 |
| Ube2u         | 2.39 | 1.25510 | 0.00042 | 0.01438 |
| Cenpj         | 2.38 | 1.25066 | 0.00072 | 0.01827 |
| Sirt5         | 2.36 | 1.24067 | 0.00002 | 0.00337 |
| Pgd           | 2.36 | 1.24028 | 0.00130 | 0.02465 |
| Gstm4         | 2.36 | 1.23971 | 0.00137 | 0.02532 |
| Mettl15       | 2.36 | 1.23919 | 0.00088 | 0.02044 |
| Kdf1          | 2.36 | 1.23852 | 0.00178 | 0.02880 |
| Galns         | 2.35 | 1.23416 | 0.00009 | 0.00705 |
| Zfp667        | 2.35 | 1.23392 | 0.00233 | 0.03273 |
| 2210039B01Rik | 2.35 | 1.23247 | 0.00023 | 0.01086 |
| Zfp53         | 2.35 | 1.23022 | 0.00436 | 0.04268 |
| Tceal8        | 2.34 | 1.22920 | 0.00241 | 0.03332 |
| Zcchc11       | 2.34 | 1.22866 | 0.00375 | 0.03999 |
| Psmf1         | 2.34 | 1.22656 | 0.00001 | 0.00249 |
| Ube2l6        | 2.34 | 1.22479 | 0.00009 | 0.00696 |
| D030056L22Rik | 2.34 | 1.22437 | 0.00044 | 0.01471 |
| Itgb3bp       | 2.33 | 1.22294 | 0.00008 | 0.00630 |
| Arhgef16      | 2.33 | 1.22035 | 0.00273 | 0.03493 |
| Slc35c2       | 2.31 | 1.20948 | 0.00134 | 0.02509 |
| Myef2         | 2.31 | 1.20856 | 0.00040 | 0.01425 |
| Plk1          | 2.30 | 1.20208 | 0.00222 | 0.03188 |
| Zfp820        | 2.30 | 1.19864 | 0.00104 | 0.02216 |
| 9230114K14Rik | 2.29 | 1.19832 | 0.00067 | 0.01780 |
| Prim2         | 2.29 | 1.19683 | 0.00205 | 0.03087 |
| 2610005L07Rik | 2.29 | 1.19458 | 0.00006 | 0.00571 |
| Uaca          | 2.29 | 1.19380 | 0.00065 | 0.01780 |
| Trappc6a      | 2.29 | 1.19299 | 0.00002 | 0.00321 |
| Rb1           | 2.28 | 1.19190 | 0.00261 | 0.03426 |
| Tubb4b        | 2.28 | 1.19175 | 0.00020 | 0.01037 |
| Fuca2         | 2.28 | 1.19072 | 0.00077 | 0.01889 |
| Brd9          | 2.28 | 1.18720 | 0.00001 | 0.00217 |
| Rfc5          | 2.28 | 1.18637 | 0.00151 | 0.02652 |
| Abcb1a        | 2.28 | 1.18630 | 0.00070 | 0.01827 |
| Szt2          | 2.27 | 1.18361 | 0.00086 | 0.02018 |
| Exosc8        | 2.26 | 1.17658 | 0.00000 | 0.00165 |
| Osbpl3        | 2.26 | 1.17564 | 0.00294 | 0.03618 |

|               |      |         |         |         |
|---------------|------|---------|---------|---------|
| Pdk4          | 2.26 | 1.17377 | 0.00281 | 0.03545 |
| Wfdc15b       | 2.25 | 1.16865 | 0.00485 | 0.04474 |
| Pdss1         | 2.25 | 1.16700 | 0.00003 | 0.00395 |
| Amot          | 2.24 | 1.16670 | 0.00029 | 0.01244 |
| Anxa5         | 2.24 | 1.16549 | 0.00182 | 0.02920 |
| Cenpt         | 2.24 | 1.16508 | 0.00046 | 0.01501 |
| D5Erttd579e   | 2.24 | 1.16373 | 0.00378 | 0.04008 |
| Nat1          | 2.24 | 1.16180 | 0.00245 | 0.03348 |
| Phf20l1       | 2.23 | 1.15986 | 0.00138 | 0.02536 |
| Asap1         | 2.23 | 1.15883 | 0.00091 | 0.02071 |
| Ccdc141       | 2.23 | 1.15828 | 0.00179 | 0.02889 |
| Myo5b         | 2.23 | 1.15632 | 0.00185 | 0.02955 |
| Phkb          | 2.23 | 1.15585 | 0.00005 | 0.00516 |
| Cmss1         | 2.22 | 1.15274 | 0.00045 | 0.01501 |
| Alpl          | 2.22 | 1.15059 | 0.00050 | 0.01562 |
| Etl4          | 2.22 | 1.15039 | 0.00036 | 0.01372 |
| Gja1          | 2.21 | 1.14657 | 0.00540 | 0.04733 |
| Gstcd         | 2.21 | 1.14598 | 0.00004 | 0.00466 |
| Zfp182        | 2.21 | 1.14591 | 0.00555 | 0.04796 |
| Prpf38a       | 2.21 | 1.14322 | 0.00093 | 0.02105 |
| Zgrf1         | 2.20 | 1.13870 | 0.00097 | 0.02155 |
| Fam213a       | 2.20 | 1.13802 | 0.00314 | 0.03720 |
| Zfp69         | 2.20 | 1.13715 | 0.00468 | 0.04398 |
| Ank3          | 2.20 | 1.13546 | 0.00528 | 0.04670 |
| Ppp2r3d       | 2.20 | 1.13512 | 0.00146 | 0.02595 |
| Rasgef1b      | 2.20 | 1.13426 | 0.00091 | 0.02071 |
| Adora1        | 2.19 | 1.13224 | 0.00587 | 0.04955 |
| Slc2a1        | 2.19 | 1.13115 | 0.00063 | 0.01765 |
| Zmat3         | 2.19 | 1.12968 | 0.00000 | 0.00088 |
| Chid1         | 2.19 | 1.12963 | 0.00067 | 0.01780 |
| Abhd4         | 2.19 | 1.12809 | 0.00390 | 0.04057 |
| Slc22a18      | 2.18 | 1.12349 | 0.00132 | 0.02477 |
| Ofd1          | 2.18 | 1.12227 | 0.00101 | 0.02197 |
| 1700048O20Rik | 2.18 | 1.12208 | 0.00014 | 0.00883 |
| I7Rn6         | 2.17 | 1.12025 | 0.00541 | 0.04739 |
| Wnt5b         | 2.17 | 1.11549 | 0.00347 | 0.03842 |
| Entpd2        | 2.17 | 1.11493 | 0.00149 | 0.02636 |
| Mtap          | 2.16 | 1.11249 | 0.00001 | 0.00223 |
| Entpd5        | 2.16 | 1.11170 | 0.00000 | 0.00165 |

|               |      |         |         |         |
|---------------|------|---------|---------|---------|
| Srcrb4d       | 2.16 | 1.11060 | 0.00018 | 0.01011 |
| Pawr          | 2.15 | 1.10676 | 0.00273 | 0.03493 |
| Eif2d         | 2.15 | 1.10587 | 0.00000 | 0.00015 |
| Lclat1        | 2.15 | 1.10546 | 0.00030 | 0.01264 |
| Clip4         | 2.15 | 1.10464 | 0.00176 | 0.02859 |
| Capn8         | 2.15 | 1.10356 | 0.00266 | 0.03449 |
| 2200002D01Rik | 2.15 | 1.10222 | 0.00142 | 0.02577 |
| Ccm2l         | 2.15 | 1.10199 | 0.00550 | 0.04777 |
| Fcor          | 2.14 | 1.10042 | 0.00170 | 0.02810 |
| Lmo7          | 2.14 | 1.10033 | 0.00040 | 0.01425 |
| Cc2d2a        | 2.14 | 1.09999 | 0.00037 | 0.01388 |
| Mknk2         | 2.14 | 1.09987 | 0.00002 | 0.00373 |
| Mtpn          | 2.14 | 1.09893 | 0.00309 | 0.03682 |
| Tob1          | 2.14 | 1.09768 | 0.00343 | 0.03830 |
| Myom3         | 2.14 | 1.09741 | 0.00374 | 0.03998 |
| Kifc5b        | 2.14 | 1.09705 | 0.00363 | 0.03935 |
| Tmem194       | 2.14 | 1.09589 | 0.00039 | 0.01411 |
| Mmp15         | 2.14 | 1.09571 | 0.00078 | 0.01912 |
| Me1           | 2.14 | 1.09474 | 0.00381 | 0.04018 |
| Ccdc122       | 2.13 | 1.08747 | 0.00027 | 0.01179 |
| A530083I20Rik | 2.12 | 1.08412 | 0.00248 | 0.03355 |
| Meis1         | 2.11 | 1.08061 | 0.00066 | 0.01780 |
| Twf2          | 2.11 | 1.08023 | 0.00001 | 0.00279 |
| Gm10336       | 2.11 | 1.07954 | 0.00041 | 0.01431 |
| Catsperd      | 2.11 | 1.07930 | 0.00102 | 0.02206 |
| Dock7         | 2.11 | 1.07818 | 0.00108 | 0.02263 |
| Ocln          | 2.11 | 1.07791 | 0.00042 | 0.01438 |
| Zfp941        | 2.11 | 1.07565 | 0.00238 | 0.03313 |
| Gyg           | 2.11 | 1.07492 | 0.00014 | 0.00888 |
| D630024D03Rik | 2.10 | 1.07108 | 0.00010 | 0.00727 |
| Rhno1         | 2.10 | 1.06946 | 0.00001 | 0.00224 |
| Rps6kc1       | 2.10 | 1.06723 | 0.00162 | 0.02756 |
| Hspa4l        | 2.09 | 1.06659 | 0.00222 | 0.03188 |
| Tssc1         | 2.09 | 1.06559 | 0.00290 | 0.03602 |
| Tinf2         | 2.09 | 1.06458 | 0.00020 | 0.01036 |
| Tgfb2         | 2.09 | 1.06029 | 0.00383 | 0.04029 |
| Zfp81         | 2.08 | 1.05941 | 0.00164 | 0.02776 |
| Mapre2        | 2.08 | 1.05799 | 0.00151 | 0.02652 |
| Asic5         | 2.08 | 1.05722 | 0.00007 | 0.00585 |

|               |      |         |         |         |
|---------------|------|---------|---------|---------|
| Anapc4        | 2.08 | 1.05568 | 0.00007 | 0.00610 |
| Avpi1         | 2.08 | 1.05475 | 0.00012 | 0.00824 |
| E2f2          | 2.08 | 1.05387 | 0.00088 | 0.02044 |
| Vrk2          | 2.08 | 1.05382 | 0.00033 | 0.01306 |
| Rbmx2         | 2.08 | 1.05324 | 0.00001 | 0.00279 |
| Ddx1          | 2.07 | 1.04932 | 0.00002 | 0.00321 |
| 3110009E18Rik | 2.07 | 1.04825 | 0.00331 | 0.03789 |
| Krt8          | 2.07 | 1.04697 | 0.00033 | 0.01306 |
| Cebpb         | 2.07 | 1.04632 | 0.00418 | 0.04173 |
| Lyp1a1        | 2.06 | 1.04587 | 0.00001 | 0.00279 |
| Ccdc68        | 2.06 | 1.04521 | 0.00259 | 0.03420 |
| Cblc          | 2.06 | 1.04458 | 0.00319 | 0.03729 |
| Aptx          | 2.06 | 1.04280 | 0.00110 | 0.02274 |
| Clhc1         | 2.06 | 1.04267 | 0.00051 | 0.01585 |
| Bbs4          | 2.06 | 1.04046 | 0.00010 | 0.00745 |
| Blm           | 2.05 | 1.03812 | 0.00093 | 0.02106 |
| AK153988      | 2.05 | 1.03707 | 0.00122 | 0.02386 |
| Rdh16         | 2.05 | 1.03554 | 0.00173 | 0.02831 |
| Ugdh          | 2.05 | 1.03403 | 0.00012 | 0.00808 |
| Fam118a       | 2.05 | 1.03244 | 0.00116 | 0.02332 |
| I133          | 2.04 | 1.03043 | 0.00109 | 0.02268 |
| Scd2          | 2.04 | 1.03042 | 0.00459 | 0.04363 |
| Parp16        | 2.04 | 1.03010 | 0.00077 | 0.01880 |
| Ces1g         | 2.04 | 1.02942 | 0.00353 | 0.03868 |
| Gnat2         | 2.04 | 1.02572 | 0.00201 | 0.03051 |
| Cdkl2         | 2.03 | 1.02397 | 0.00029 | 0.01228 |
| Syne3         | 2.03 | 1.02058 | 0.00193 | 0.03025 |
| Tasp1         | 2.03 | 1.01905 | 0.00185 | 0.02951 |
| Ccl9          | 2.02 | 1.01710 | 0.00142 | 0.02577 |
| Uvrag         | 2.02 | 1.01673 | 0.00054 | 0.01631 |
| Commd3        | 2.02 | 1.01395 | 0.00276 | 0.03505 |
| Mkrn2os       | 2.02 | 1.01153 | 0.00103 | 0.02211 |
| Kif24         | 2.02 | 1.01092 | 0.00265 | 0.03449 |
| Ephx1         | 2.01 | 1.01022 | 0.00005 | 0.00488 |
| Zfp438        | 2.01 | 1.00706 | 0.00222 | 0.03188 |
| Slc3a1        | 2.01 | 1.00501 | 0.00124 | 0.02397 |
| Fanci         | 2.00 | 1.00086 | 0.00059 | 0.01718 |
| Ppap2a        | 2.00 | 0.99992 | 0.00030 | 0.01264 |
| Nudcd2        | 2.00 | 0.99806 | 0.00015 | 0.00909 |

|               |      |         |         |         |
|---------------|------|---------|---------|---------|
| Cast          | 2.00 | 0.99718 | 0.00114 | 0.02315 |
| Dpp7          | 2.00 | 0.99696 | 0.00003 | 0.00403 |
| Lrig3         | 1.99 | 0.99551 | 0.00507 | 0.04581 |
| Lrp1          | 1.99 | 0.99470 | 0.00381 | 0.04018 |
| Myo1b         | 1.99 | 0.98952 | 0.00070 | 0.01822 |
| Slc23a1       | 1.98 | 0.98861 | 0.00106 | 0.02239 |
| AA408650      | 1.98 | 0.98835 | 0.00201 | 0.03051 |
| Tmsb10        | 1.98 | 0.98732 | 0.00021 | 0.01048 |
| Slc1a4        | 1.98 | 0.98651 | 0.00551 | 0.04777 |
| Camkmt        | 1.98 | 0.98556 | 0.00089 | 0.02054 |
| Hpgd          | 1.98 | 0.98503 | 0.00178 | 0.02872 |
| Cdkn3         | 1.97 | 0.97920 | 0.00570 | 0.04878 |
| Itfg1         | 1.97 | 0.97916 | 0.00126 | 0.02411 |
| Pnpla5        | 1.97 | 0.97881 | 0.00001 | 0.00279 |
| Rnd2          | 1.97 | 0.97744 | 0.00016 | 0.00938 |
| Erc5          | 1.96 | 0.97211 | 0.00016 | 0.00920 |
| LOC75771      | 1.96 | 0.96916 | 0.00039 | 0.01408 |
| Spon2         | 1.96 | 0.96762 | 0.00470 | 0.04403 |
| Bche          | 1.95 | 0.96608 | 0.00007 | 0.00599 |
| Tpgs2         | 1.95 | 0.96499 | 0.00231 | 0.03259 |
| Asah2         | 1.95 | 0.96390 | 0.00004 | 0.00465 |
| Rnf141        | 1.95 | 0.96108 | 0.00003 | 0.00395 |
| Vat1          | 1.95 | 0.95991 | 0.00018 | 0.00990 |
| 2210016H18Rik | 1.94 | 0.95741 | 0.00224 | 0.03193 |
| Cep72         | 1.94 | 0.95684 | 0.00079 | 0.01918 |
| C80998        | 1.94 | 0.95555 | 0.00047 | 0.01520 |
| Ctbs          | 1.94 | 0.95362 | 0.00049 | 0.01553 |
| Slc22a4       | 1.93 | 0.94992 | 0.00568 | 0.04862 |
| D8Erd51e      | 1.93 | 0.94897 | 0.00127 | 0.02421 |
| Bbip1         | 1.93 | 0.94889 | 0.00075 | 0.01870 |
| Zfp518a       | 1.93 | 0.94865 | 0.00075 | 0.01870 |
| Med30         | 1.93 | 0.94857 | 0.00063 | 0.01765 |
| 4930509E16Rik | 1.93 | 0.94698 | 0.00155 | 0.02678 |
| Adamts9       | 1.93 | 0.94677 | 0.00307 | 0.03673 |
| Aldh1a7       | 1.93 | 0.94576 | 0.00000 | 0.00120 |
| Tstd3         | 1.93 | 0.94551 | 0.00020 | 0.01037 |
| Pvt1          | 1.93 | 0.94495 | 0.00057 | 0.01694 |
| Omd           | 1.93 | 0.94488 | 0.00026 | 0.01179 |
| Mvp           | 1.92 | 0.94435 | 0.00124 | 0.02404 |



|               |      |         |         |         |
|---------------|------|---------|---------|---------|
| Pld6          | 1.92 | 0.94344 | 0.00166 | 0.02791 |
| Spns2         | 1.92 | 0.94131 | 0.00126 | 0.02411 |
| 4930558J18Rik | 1.92 | 0.94130 | 0.00007 | 0.00610 |
| Aim1          | 1.92 | 0.94108 | 0.00104 | 0.02217 |
| Slc35e3       | 1.92 | 0.94099 | 0.00028 | 0.01215 |
| Rttn          | 1.92 | 0.93824 | 0.00002 | 0.00343 |
| Dzip3         | 1.91 | 0.93606 | 0.00002 | 0.00359 |
| Utp23         | 1.91 | 0.93546 | 0.00019 | 0.01028 |
| Ehd1          | 1.91 | 0.93434 | 0.00161 | 0.02751 |
| Eme1          | 1.91 | 0.93404 | 0.00151 | 0.02652 |
| Arhgap5       | 1.91 | 0.93367 | 0.00444 | 0.04297 |
| Zfp472        | 1.91 | 0.93333 | 0.00167 | 0.02795 |
| Myh14         | 1.91 | 0.93326 | 0.00227 | 0.03225 |
| Tox           | 1.91 | 0.93047 | 0.00237 | 0.03306 |
| Rangap1       | 1.91 | 0.93020 | 0.00013 | 0.00833 |
| Det1          | 1.90 | 0.92624 | 0.00369 | 0.03961 |
| Anxa7         | 1.90 | 0.92492 | 0.00030 | 0.01244 |
| Zc4h2         | 1.90 | 0.92405 | 0.00022 | 0.01074 |
| Acad9         | 1.90 | 0.92301 | 0.00048 | 0.01530 |
| 2810428I15Rik | 1.89 | 0.91952 | 0.00001 | 0.00279 |
| 6030400A10Rik | 1.89 | 0.91918 | 0.00317 | 0.03723 |
| Dcaf4         | 1.89 | 0.91893 | 0.00114 | 0.02315 |
| Elovl1        | 1.89 | 0.91863 | 0.00251 | 0.03369 |
| Rab3gap2      | 1.89 | 0.91797 | 0.00330 | 0.03782 |
| Gal3st1       | 1.89 | 0.91720 | 0.00334 | 0.03802 |
| Emc9          | 1.89 | 0.91678 | 0.00116 | 0.02332 |
| Galnt10       | 1.89 | 0.91502 | 0.00455 | 0.04352 |
| Tgm2          | 1.89 | 0.91460 | 0.00004 | 0.00464 |
| Tbck          | 1.88 | 0.91422 | 0.00021 | 0.01041 |
| Sdc1          | 1.88 | 0.91264 | 0.00168 | 0.02798 |
| Vtcn1         | 1.88 | 0.91082 | 0.00007 | 0.00593 |
| Marveld2      | 1.88 | 0.91063 | 0.00020 | 0.01037 |
| Aprt          | 1.88 | 0.90822 | 0.00000 | 0.00213 |
| Pde7a         | 1.88 | 0.90814 | 0.00006 | 0.00544 |
| Xrcc1         | 1.87 | 0.90638 | 0.00011 | 0.00770 |
| Zfp958        | 1.87 | 0.90444 | 0.00352 | 0.03863 |
| Camsap3       | 1.87 | 0.90419 | 0.00116 | 0.02332 |
| 5430416B10Rik | 1.87 | 0.90198 | 0.00319 | 0.03729 |
| Hexa          | 1.87 | 0.90094 | 0.00057 | 0.01694 |

|               |      |         |         |         |
|---------------|------|---------|---------|---------|
| Tpk1          | 1.87 | 0.90019 | 0.00060 | 0.01725 |
| Golt1a        | 1.87 | 0.90017 | 0.00055 | 0.01652 |
| Fat1          | 1.86 | 0.89827 | 0.00251 | 0.03368 |
| S1pr3         | 1.86 | 0.89822 | 0.00339 | 0.03812 |
| Cks2          | 1.86 | 0.89764 | 0.00001 | 0.00272 |
| Carf          | 1.86 | 0.89659 | 0.00049 | 0.01550 |
| 5430439M09Rik | 1.86 | 0.89570 | 0.00018 | 0.01000 |
| Enc1          | 1.86 | 0.89536 | 0.00451 | 0.04328 |
| Rpap3         | 1.86 | 0.89213 | 0.00071 | 0.01827 |
| Agxt2         | 1.85 | 0.89134 | 0.00137 | 0.02532 |
| Bcdin3d       | 1.85 | 0.88803 | 0.00001 | 0.00249 |
| Pfkfb2        | 1.85 | 0.88678 | 0.00259 | 0.03420 |
| C130051F05Rik | 1.85 | 0.88563 | 0.00211 | 0.03132 |
| Slc26a6       | 1.85 | 0.88523 | 0.00052 | 0.01585 |
| Bax           | 1.85 | 0.88520 | 0.00009 | 0.00696 |
| Ptk2b         | 1.85 | 0.88470 | 0.00023 | 0.01086 |
| Nup37         | 1.84 | 0.88286 | 0.00020 | 0.01028 |
| Nsl1          | 1.84 | 0.88268 | 0.00110 | 0.02274 |
| Coq7          | 1.84 | 0.88239 | 0.00003 | 0.00389 |
| Ptpk          | 1.84 | 0.88011 | 0.00293 | 0.03618 |
| AI314180      | 1.84 | 0.87781 | 0.00005 | 0.00488 |
| Zfp78         | 1.84 | 0.87772 | 0.00186 | 0.02961 |
| Mgmt          | 1.84 | 0.87659 | 0.00264 | 0.03449 |
| Tfcp2l1       | 1.84 | 0.87582 | 0.00338 | 0.03812 |
| Xpo1          | 1.83 | 0.87535 | 0.00001 | 0.00279 |
| Gstm7         | 1.83 | 0.87500 | 0.00064 | 0.01765 |
| Mpzi3         | 1.83 | 0.87404 | 0.00007 | 0.00585 |
| Ubiad1        | 1.83 | 0.87339 | 0.00022 | 0.01074 |
| Impact        | 1.83 | 0.87254 | 0.00146 | 0.02606 |
| Arhgap44      | 1.83 | 0.87228 | 0.00261 | 0.03426 |
| Trim37        | 1.83 | 0.87100 | 0.00330 | 0.03782 |
| Cep83         | 1.83 | 0.87011 | 0.00057 | 0.01683 |
| Clint1        | 1.83 | 0.86866 | 0.00001 | 0.00279 |
| Erc3          | 1.83 | 0.86801 | 0.00108 | 0.02263 |
| Nap1l1        | 1.82 | 0.86736 | 0.00007 | 0.00610 |
| Sesn2         | 1.82 | 0.86589 | 0.00212 | 0.03133 |
| 1700034P13Rik | 1.82 | 0.86313 | 0.00201 | 0.03051 |
| Map4          | 1.82 | 0.86292 | 0.00109 | 0.02271 |
| Hspbap1       | 1.82 | 0.86244 | 0.00141 | 0.02577 |

|               |      |         |         |         |
|---------------|------|---------|---------|---------|
| 1500011K16Rik | 1.82 | 0.86160 | 0.00005 | 0.00488 |
| Mettl4        | 1.82 | 0.86053 | 0.00353 | 0.03868 |
| Fkbp11        | 1.82 | 0.86052 | 0.00300 | 0.03650 |
| Rad51ap1      | 1.81 | 0.85914 | 0.00551 | 0.04777 |
| Eri1          | 1.81 | 0.85532 | 0.00002 | 0.00330 |
| Bora          | 1.81 | 0.85390 | 0.00126 | 0.02412 |
| 6820431F20Rik | 1.81 | 0.85267 | 0.00050 | 0.01569 |
| Rfescd        | 1.81 | 0.85230 | 0.00025 | 0.01143 |
| Dcxr          | 1.80 | 0.85197 | 0.00044 | 0.01471 |
| Atp9a         | 1.80 | 0.85183 | 0.00011 | 0.00772 |
| Mrpl33        | 1.80 | 0.85046 | 0.00170 | 0.02808 |
| Slc39a14      | 1.80 | 0.84807 | 0.00331 | 0.03786 |
| Wisp1         | 1.80 | 0.84721 | 0.00083 | 0.01988 |
| Ddx59         | 1.80 | 0.84630 | 0.00354 | 0.03875 |
| Hmgb2         | 1.80 | 0.84627 | 0.00127 | 0.02412 |
| Atxn10        | 1.80 | 0.84485 | 0.00014 | 0.00863 |
| Ap1m1         | 1.79 | 0.84337 | 0.00245 | 0.03348 |
| LOC101056118  | 1.79 | 0.84318 | 0.00071 | 0.01827 |
| Rarb          | 1.79 | 0.84307 | 0.00438 | 0.04274 |
| Clec16a       | 1.79 | 0.84047 | 0.00014 | 0.00863 |
| Aasdh         | 1.79 | 0.83812 | 0.00023 | 0.01086 |
| Slc16a7       | 1.79 | 0.83778 | 0.00163 | 0.02758 |
| Lasp1         | 1.78 | 0.83591 | 0.00005 | 0.00488 |
| Tnfsf10       | 1.78 | 0.83491 | 0.00342 | 0.03828 |
| Rdh5          | 1.78 | 0.83010 | 0.00061 | 0.01732 |
| 9130002K18Rik | 1.78 | 0.82994 | 0.00560 | 0.04826 |
| Exd1          | 1.78 | 0.82954 | 0.00277 | 0.03513 |
| Mtx3          | 1.77 | 0.82719 | 0.00120 | 0.02361 |
| E130110O22Rik | 1.77 | 0.82654 | 0.00131 | 0.02466 |
| Megf9         | 1.77 | 0.82608 | 0.00469 | 0.04399 |
| Kidins220     | 1.77 | 0.82606 | 0.00059 | 0.01713 |
| Cep120        | 1.77 | 0.82551 | 0.00036 | 0.01369 |
| Mrpl15        | 1.77 | 0.82468 | 0.00020 | 0.01040 |
| Slc50a1       | 1.77 | 0.82414 | 0.00041 | 0.01425 |
| 1810022K09Rik | 1.77 | 0.82144 | 0.00592 | 0.04979 |
| Arhgef39      | 1.76 | 0.81916 | 0.00131 | 0.02466 |
| Dck           | 1.76 | 0.81811 | 0.00167 | 0.02795 |
| Tgfb1         | 1.76 | 0.81677 | 0.00329 | 0.03775 |
| Fam129c       | 1.76 | 0.81612 | 0.00178 | 0.02880 |

|               |      |         |         |         |
|---------------|------|---------|---------|---------|
| Cyp4v3        | 1.76 | 0.81576 | 0.00453 | 0.04337 |
| Gfm1          | 1.76 | 0.81479 | 0.00333 | 0.03800 |
| Cpeb3         | 1.75 | 0.81117 | 0.00299 | 0.03643 |
| Ap3m1         | 1.75 | 0.81018 | 0.00082 | 0.01962 |
| Isoc1         | 1.75 | 0.81002 | 0.00009 | 0.00713 |
| Dpysl2        | 1.75 | 0.80912 | 0.00000 | 0.00128 |
| Reep4         | 1.75 | 0.80901 | 0.00171 | 0.02817 |
| Dlc1          | 1.75 | 0.80901 | 0.00423 | 0.04211 |
| Apoc2         | 1.75 | 0.80887 | 0.00110 | 0.02275 |
| Chmp2b        | 1.75 | 0.80691 | 0.00547 | 0.04760 |
| Ssh1          | 1.75 | 0.80658 | 0.00106 | 0.02234 |
| Phka2         | 1.75 | 0.80656 | 0.00132 | 0.02479 |
| Gsdmd         | 1.75 | 0.80652 | 0.00017 | 0.00954 |
| Sf3b5         | 1.75 | 0.80582 | 0.00002 | 0.00321 |
| Mad2l1bp      | 1.75 | 0.80521 | 0.00352 | 0.03861 |
| Cth           | 1.75 | 0.80483 | 0.00008 | 0.00655 |
| Cse1l         | 1.74 | 0.80305 | 0.00009 | 0.00668 |
| Cdk17         | 1.74 | 0.80296 | 0.00450 | 0.04323 |
| Aox1          | 1.74 | 0.80233 | 0.00022 | 0.01074 |
| Tmem219       | 1.74 | 0.79829 | 0.00174 | 0.02852 |
| Dqx1          | 1.74 | 0.79811 | 0.00275 | 0.03498 |
| 4930427A07Rik | 1.74 | 0.79710 | 0.00316 | 0.03723 |
| Arhgap26      | 1.74 | 0.79693 | 0.00015 | 0.00906 |
| BC030867      | 1.74 | 0.79645 | 0.00099 | 0.02173 |
| Lym2          | 1.74 | 0.79626 | 0.00090 | 0.02071 |
| Pole          | 1.74 | 0.79518 | 0.00286 | 0.03589 |
| Amy1          | 1.73 | 0.79485 | 0.00186 | 0.02961 |
| Man2b2        | 1.73 | 0.79465 | 0.00047 | 0.01518 |
| Mageh1        | 1.73 | 0.79456 | 0.00336 | 0.03804 |
| Rnaseh2b      | 1.73 | 0.79410 | 0.00019 | 0.01028 |
| LOC102640387  | 1.73 | 0.79388 | 0.00223 | 0.03189 |
| Snx10         | 1.73 | 0.79318 | 0.00261 | 0.03426 |
| Chchd6        | 1.73 | 0.79209 | 0.00475 | 0.04431 |
| 1810010H24Rik | 1.73 | 0.79167 | 0.00064 | 0.01778 |
| Fbxo36        | 1.73 | 0.79142 | 0.00030 | 0.01244 |
| Thoc1         | 1.73 | 0.79100 | 0.00470 | 0.04403 |
| Igfbp5        | 1.73 | 0.78980 | 0.00388 | 0.04046 |
| Nsun3         | 1.73 | 0.78873 | 0.00020 | 0.01037 |
| Cables1       | 1.73 | 0.78681 | 0.00430 | 0.04244 |

|               |      |         |         |         |
|---------------|------|---------|---------|---------|
| Nhp2          | 1.72 | 0.78635 | 0.00090 | 0.02071 |
| Mre11a        | 1.72 | 0.78609 | 0.00003 | 0.00407 |
| Wwp2          | 1.72 | 0.78553 | 0.00427 | 0.04230 |
| Mb21d2        | 1.72 | 0.78463 | 0.00381 | 0.04018 |
| Zfand1        | 1.72 | 0.78348 | 0.00100 | 0.02179 |
| Hn1           | 1.72 | 0.78279 | 0.00221 | 0.03188 |
| Tmem53        | 1.72 | 0.78268 | 0.00155 | 0.02682 |
| Slc30a1       | 1.72 | 0.78181 | 0.00321 | 0.03738 |
| Poll          | 1.72 | 0.78105 | 0.00062 | 0.01742 |
| Tap1          | 1.72 | 0.78075 | 0.00295 | 0.03623 |
| Smim8         | 1.72 | 0.77998 | 0.00004 | 0.00455 |
| Enpp3         | 1.72 | 0.77976 | 0.00024 | 0.01113 |
| Dclre1a       | 1.71 | 0.77766 | 0.00039 | 0.01404 |
| Invs          | 1.71 | 0.77686 | 0.00254 | 0.03382 |
| Dhcr24        | 1.71 | 0.77682 | 0.00010 | 0.00740 |
| Cdc14a        | 1.71 | 0.77653 | 0.00197 | 0.03035 |
| Slc36a1       | 1.71 | 0.77647 | 0.00189 | 0.02984 |
| Gchfr         | 1.71 | 0.77584 | 0.00031 | 0.01273 |
| Ift172        | 1.71 | 0.77561 | 0.00015 | 0.00899 |
| Cyp39a1       | 1.71 | 0.77517 | 0.00540 | 0.04733 |
| Comt          | 1.71 | 0.77500 | 0.00021 | 0.01046 |
| Chd1l         | 1.71 | 0.77450 | 0.00096 | 0.02144 |
| Dbndd2        | 1.71 | 0.77356 | 0.00013 | 0.00835 |
| Ggt6          | 1.71 | 0.77283 | 0.00103 | 0.02211 |
| Myh10         | 1.71 | 0.77082 | 0.00433 | 0.04255 |
| 8030447M02Rik | 1.71 | 0.77033 | 0.00151 | 0.02652 |
| Trio          | 1.70 | 0.76901 | 0.00108 | 0.02263 |
| Arhgef5       | 1.70 | 0.76886 | 0.00056 | 0.01665 |
| Tpm1          | 1.70 | 0.76872 | 0.00019 | 0.01028 |
| Nmi           | 1.70 | 0.76764 | 0.00242 | 0.03337 |
| Slc25a10      | 1.70 | 0.76755 | 0.00104 | 0.02221 |
| Kctd9         | 1.70 | 0.76705 | 0.00001 | 0.00279 |
| Krt18         | 1.70 | 0.76669 | 0.00188 | 0.02974 |
| Sike1         | 1.70 | 0.76656 | 0.00085 | 0.01998 |
| Coa6          | 1.70 | 0.76604 | 0.00169 | 0.02808 |
| Exoc3         | 1.70 | 0.76545 | 0.00003 | 0.00429 |
| Exosc9        | 1.70 | 0.76449 | 0.00001 | 0.00274 |
| Dhx35         | 1.70 | 0.76413 | 0.00320 | 0.03738 |
| Zswim7        | 1.70 | 0.76301 | 0.00066 | 0.01780 |

|               |      |         |         |         |
|---------------|------|---------|---------|---------|
| Ptgr1         | 1.70 | 0.76180 | 0.00307 | 0.03677 |
| Tfpi2         | 1.69 | 0.76106 | 0.00093 | 0.02105 |
| Psm7          | 1.69 | 0.75986 | 0.00095 | 0.02132 |
| Xrcc5         | 1.69 | 0.75982 | 0.00071 | 0.01827 |
| Mrpl13        | 1.69 | 0.75884 | 0.00226 | 0.03221 |
| Rcbtb2        | 1.69 | 0.75712 | 0.00301 | 0.03650 |
| Tspan7        | 1.69 | 0.75499 | 0.00082 | 0.01971 |
| Dnaaf2        | 1.69 | 0.75424 | 0.00000 | 0.00213 |
| Atf7ip        | 1.69 | 0.75291 | 0.00071 | 0.01827 |
| Trim12a       | 1.68 | 0.75269 | 0.00514 | 0.04615 |
| Agfg1         | 1.68 | 0.75258 | 0.00156 | 0.02688 |
| Ppfbp2        | 1.68 | 0.75242 | 0.00145 | 0.02590 |
| Drc1          | 1.68 | 0.75128 | 0.00413 | 0.04165 |
| Plp1          | 1.68 | 0.75107 | 0.00208 | 0.03112 |
| Rcan1         | 1.68 | 0.75083 | 0.00462 | 0.04372 |
| Cda           | 1.68 | 0.75000 | 0.00111 | 0.02282 |
| B230118H07Rik | 1.68 | 0.74909 | 0.00009 | 0.00696 |
| Atl1          | 1.68 | 0.74863 | 0.00083 | 0.01972 |
| 9130011E15Rik | 1.68 | 0.74851 | 0.00011 | 0.00772 |
| Vps36         | 1.68 | 0.74764 | 0.00004 | 0.00472 |
| Ttc38         | 1.68 | 0.74650 | 0.00007 | 0.00610 |
| Ccdc158       | 1.68 | 0.74617 | 0.00235 | 0.03287 |
| Fam184b       | 1.68 | 0.74576 | 0.00218 | 0.03171 |
| BC026585      | 1.68 | 0.74575 | 0.00030 | 0.01259 |
| Psm1          | 1.68 | 0.74438 | 0.00056 | 0.01665 |
| Skiv2l2       | 1.67 | 0.74407 | 0.00079 | 0.01915 |
| Aspa          | 1.67 | 0.74241 | 0.00069 | 0.01821 |
| Alg6          | 1.67 | 0.74176 | 0.00222 | 0.03188 |
| Heatr1        | 1.67 | 0.74129 | 0.00016 | 0.00928 |
| Rwdd2b        | 1.67 | 0.74052 | 0.00071 | 0.01827 |
| Parp4         | 1.67 | 0.74045 | 0.00066 | 0.01780 |
| Blvrb         | 1.67 | 0.74002 | 0.00505 | 0.04573 |
| Lmbr1         | 1.67 | 0.73747 | 0.00044 | 0.01471 |
| Smarce1       | 1.67 | 0.73559 | 0.00014 | 0.00888 |
| Slc38a9       | 1.66 | 0.73517 | 0.00310 | 0.03689 |
| Ghdc          | 1.66 | 0.73299 | 0.00004 | 0.00455 |
| Nicn1         | 1.66 | 0.73225 | 0.00005 | 0.00488 |
| Trmt10a       | 1.66 | 0.73143 | 0.00065 | 0.01780 |
| Nudcd3        | 1.66 | 0.73100 | 0.00063 | 0.01754 |

|               |      |         |         |         |
|---------------|------|---------|---------|---------|
| Mas1          | 1.66 | 0.73074 | 0.00084 | 0.01989 |
| Rtel1         | 1.66 | 0.73004 | 0.00390 | 0.04056 |
| Ces2g         | 1.66 | 0.72990 | 0.00152 | 0.02652 |
| 4933404I11Rik | 1.66 | 0.72946 | 0.00199 | 0.03044 |
| Prnp          | 1.66 | 0.72900 | 0.00048 | 0.01546 |
| Polr3gl       | 1.66 | 0.72772 | 0.00576 | 0.04903 |
| BC003331      | 1.66 | 0.72704 | 0.00158 | 0.02710 |
| Cul3          | 1.65 | 0.72679 | 0.00317 | 0.03723 |
| Mdh2          | 1.65 | 0.72667 | 0.00104 | 0.02217 |
| Ran           | 1.65 | 0.72659 | 0.00011 | 0.00749 |
| Chchd5        | 1.65 | 0.72658 | 0.00194 | 0.03025 |
| Klhdc2        | 1.65 | 0.72383 | 0.00177 | 0.02870 |
| Tmem177       | 1.65 | 0.72381 | 0.00172 | 0.02829 |
| Plac8         | 1.65 | 0.72361 | 0.00598 | 0.04996 |
| Psmc4         | 1.65 | 0.72328 | 0.00384 | 0.04031 |
| Acyp1         | 1.65 | 0.72312 | 0.00587 | 0.04955 |
| Cwc27         | 1.65 | 0.72207 | 0.00124 | 0.02399 |
| Ints1         | 1.65 | 0.72176 | 0.00050 | 0.01562 |
| Mecr          | 1.65 | 0.72130 | 0.00565 | 0.04847 |
| Rad23a        | 1.65 | 0.72062 | 0.00076 | 0.01872 |
| Mllt10        | 1.65 | 0.71915 | 0.00365 | 0.03945 |
| A930013F10Rik | 1.65 | 0.71852 | 0.00513 | 0.04612 |
| AU041133      | 1.65 | 0.71826 | 0.00058 | 0.01708 |
| Ubxn4         | 1.64 | 0.71730 | 0.00294 | 0.03618 |
| Tmx3          | 1.64 | 0.71693 | 0.00007 | 0.00585 |
| Zfp473        | 1.64 | 0.71663 | 0.00220 | 0.03185 |
| Fam160a2      | 1.64 | 0.71556 | 0.00570 | 0.04877 |
| 4732468M13Rik | 1.64 | 0.71548 | 0.00002 | 0.00321 |
| Trp53bp1      | 1.64 | 0.71523 | 0.00119 | 0.02354 |
| Dhdds         | 1.64 | 0.71413 | 0.00120 | 0.02374 |
| Metap1d       | 1.64 | 0.71381 | 0.00116 | 0.02332 |
| Gmcl1         | 1.64 | 0.71368 | 0.00188 | 0.02974 |
| Braf          | 1.64 | 0.71252 | 0.00236 | 0.03303 |
| Cenpo         | 1.64 | 0.71234 | 0.00084 | 0.01991 |
| Maged2        | 1.64 | 0.71072 | 0.00038 | 0.01396 |
| Cry2          | 1.63 | 0.70864 | 0.00068 | 0.01792 |
| Bloc1s5       | 1.63 | 0.70849 | 0.00004 | 0.00455 |
| Hnrnpc        | 1.63 | 0.70838 | 0.00470 | 0.04402 |
| Tmem175       | 1.63 | 0.70797 | 0.00081 | 0.01941 |

|               |      |         |         |         |
|---------------|------|---------|---------|---------|
| Slc9a8        | 1.63 | 0.70784 | 0.00206 | 0.03097 |
| Adh7          | 1.63 | 0.70655 | 0.00326 | 0.03758 |
| Rtkn          | 1.63 | 0.70594 | 0.00325 | 0.03752 |
| Dars2         | 1.63 | 0.70428 | 0.00019 | 0.01028 |
| Med4          | 1.63 | 0.70338 | 0.00135 | 0.02518 |
| Eif2s2        | 1.63 | 0.70313 | 0.00039 | 0.01408 |
| Lrwd1         | 1.63 | 0.70240 | 0.00198 | 0.03042 |
| Nedd1         | 1.63 | 0.70173 | 0.00277 | 0.03513 |
| Ermp1         | 1.63 | 0.70163 | 0.00022 | 0.01074 |
| Fam172a       | 1.63 | 0.70116 | 0.00243 | 0.03340 |
| Mansc1        | 1.62 | 0.69839 | 0.00147 | 0.02607 |
| Sys1          | 1.62 | 0.69822 | 0.00027 | 0.01179 |
| Them7         | 1.62 | 0.69573 | 0.00099 | 0.02174 |
| Rpp30         | 1.62 | 0.69538 | 0.00085 | 0.02008 |
| Exoc6         | 1.62 | 0.69401 | 0.00061 | 0.01732 |
| Psmg4         | 1.62 | 0.69157 | 0.00265 | 0.03449 |
| Clstn3        | 1.61 | 0.69139 | 0.00094 | 0.02126 |
| Gramd1c       | 1.61 | 0.69084 | 0.00030 | 0.01257 |
| 5031425E22Rik | 1.61 | 0.69044 | 0.00110 | 0.02278 |
| Sorbs1        | 1.61 | 0.68974 | 0.00235 | 0.03287 |
| Thnsl1        | 1.61 | 0.68926 | 0.00067 | 0.01780 |
| Etnk2         | 1.61 | 0.68824 | 0.00572 | 0.04886 |
| Ptpn4         | 1.61 | 0.68823 | 0.00015 | 0.00909 |
| Ttll12        | 1.61 | 0.68610 | 0.00018 | 0.00983 |
| Herpud2       | 1.61 | 0.68450 | 0.00373 | 0.03995 |
| Galm          | 1.61 | 0.68440 | 0.00153 | 0.02659 |
| A530079E22Rik | 1.61 | 0.68371 | 0.00273 | 0.03493 |
| Vps25         | 1.61 | 0.68335 | 0.00088 | 0.02040 |
| Plgrkt        | 1.61 | 0.68304 | 0.00597 | 0.04992 |
| Camk2g        | 1.61 | 0.68298 | 0.00080 | 0.01921 |
| Dhrs7b        | 1.60 | 0.68208 | 0.00071 | 0.01827 |
| Taf1d         | 1.60 | 0.68072 | 0.00316 | 0.03723 |
| Ly6f          | 1.60 | 0.68067 | 0.00418 | 0.04173 |
| Plaa          | 1.60 | 0.67924 | 0.00058 | 0.01708 |
| Nostrin       | 1.60 | 0.67906 | 0.00324 | 0.03749 |
| C1d           | 1.60 | 0.67849 | 0.00563 | 0.04842 |
| Alcam         | 1.60 | 0.67840 | 0.00439 | 0.04279 |
| Mat1a         | 1.60 | 0.67806 | 0.00039 | 0.01411 |
| Zfp788        | 1.60 | 0.67780 | 0.00056 | 0.01680 |



|               |      |         |         |         |
|---------------|------|---------|---------|---------|
| Pkn3          | 1.60 | 0.67666 | 0.00228 | 0.03231 |
| Prps2         | 1.60 | 0.67656 | 0.00024 | 0.01116 |
| Tatdn1        | 1.59 | 0.67159 | 0.00197 | 0.03035 |
| Hdac8         | 1.59 | 0.67150 | 0.00281 | 0.03545 |
| 4933426M11Rik | 1.59 | 0.67148 | 0.00303 | 0.03663 |
| Fbxo6         | 1.59 | 0.67059 | 0.00103 | 0.02211 |
| Myh9          | 1.59 | 0.66918 | 0.00054 | 0.01632 |
| Parp12        | 1.59 | 0.66896 | 0.00302 | 0.03656 |
| Zfp775        | 1.59 | 0.66838 | 0.00378 | 0.04008 |
| Dnajb12       | 1.59 | 0.66745 | 0.00347 | 0.03842 |
| Tnfaip1       | 1.59 | 0.66732 | 0.00006 | 0.00547 |
| Nudt16        | 1.59 | 0.66663 | 0.00559 | 0.04816 |
| Jund          | 1.59 | 0.66660 | 0.00550 | 0.04776 |
| Col15a1       | 1.59 | 0.66628 | 0.00307 | 0.03677 |
| Cttn          | 1.59 | 0.66528 | 0.00242 | 0.03337 |
| Rapgef6       | 1.59 | 0.66513 | 0.00239 | 0.03319 |
| Mpzl2         | 1.59 | 0.66498 | 0.00108 | 0.02263 |
| Tbrg1         | 1.58 | 0.66419 | 0.00070 | 0.01827 |
| Mmp19         | 1.58 | 0.66357 | 0.00365 | 0.03945 |
| Pptc7         | 1.58 | 0.66287 | 0.00033 | 0.01309 |
| Tbc1d32       | 1.58 | 0.66220 | 0.00515 | 0.04623 |
| Tnrc6a        | 1.58 | 0.66142 | 0.00074 | 0.01867 |
| Cdc25c        | 1.58 | 0.66098 | 0.00094 | 0.02126 |
| Ube2v2        | 1.58 | 0.66090 | 0.00313 | 0.03712 |
| Dusp19        | 1.58 | 0.66089 | 0.00218 | 0.03167 |
| G730007D18Rik | 1.58 | 0.66082 | 0.00517 | 0.04629 |
| Tmem62        | 1.58 | 0.66069 | 0.00164 | 0.02771 |
| Lcp1          | 1.58 | 0.66054 | 0.00463 | 0.04378 |
| Gmnn          | 1.58 | 0.66049 | 0.00037 | 0.01374 |
| Mettl22       | 1.58 | 0.65937 | 0.00452 | 0.04331 |
| Cpm           | 1.58 | 0.65912 | 0.00283 | 0.03563 |
| Gtf2h2        | 1.58 | 0.65905 | 0.00067 | 0.01780 |
| Emc1          | 1.58 | 0.65847 | 0.00057 | 0.01683 |
| Alg14         | 1.58 | 0.65760 | 0.00411 | 0.04146 |
| Ttc8          | 1.58 | 0.65693 | 0.00041 | 0.01431 |
| Fkbp9         | 1.58 | 0.65650 | 0.00096 | 0.02144 |
| Lag3          | 1.58 | 0.65649 | 0.00202 | 0.03051 |
| Kpna2         | 1.58 | 0.65592 | 0.00012 | 0.00795 |
| Ccdc71l       | 1.58 | 0.65582 | 0.00009 | 0.00696 |

|               |      |         |         |         |
|---------------|------|---------|---------|---------|
| Gstm5         | 1.57 | 0.65342 | 0.00039 | 0.01402 |
| Fancl         | 1.57 | 0.65225 | 0.00218 | 0.03168 |
| Dap3          | 1.57 | 0.65207 | 0.00013 | 0.00830 |
| Nrd1          | 1.57 | 0.65146 | 0.00464 | 0.04378 |
| March7        | 1.57 | 0.65022 | 0.00450 | 0.04325 |
| Slc39a11      | 1.57 | 0.65019 | 0.00023 | 0.01081 |
| Arl3          | 1.57 | 0.64972 | 0.00061 | 0.01732 |
| Chfr          | 1.57 | 0.64912 | 0.00322 | 0.03744 |
| H2afz         | 1.57 | 0.64819 | 0.00228 | 0.03231 |
| Srr           | 1.57 | 0.64749 | 0.00157 | 0.02696 |
| Ppp5c         | 1.57 | 0.64726 | 0.00007 | 0.00585 |
| Rabgap1       | 1.56 | 0.64597 | 0.00107 | 0.02258 |
| Orc3          | 1.56 | 0.64574 | 0.00119 | 0.02354 |
| Fam126a       | 1.56 | 0.64450 | 0.00244 | 0.03345 |
| Thyn1         | 1.56 | 0.64378 | 0.00511 | 0.04600 |
| Cyb5r4        | 1.56 | 0.64324 | 0.00001 | 0.00279 |
| Txn2          | 1.56 | 0.64281 | 0.00012 | 0.00808 |
| Acsm5         | 1.56 | 0.64273 | 0.00598 | 0.04993 |
| Jkamp         | 1.56 | 0.64218 | 0.00532 | 0.04691 |
| Dclre1b       | 1.56 | 0.64193 | 0.00462 | 0.04372 |
| Haus1         | 1.56 | 0.64178 | 0.00126 | 0.02412 |
| Coq3          | 1.56 | 0.64037 | 0.00458 | 0.04357 |
| Nup35         | 1.56 | 0.64014 | 0.00445 | 0.04298 |
| Enox2         | 1.56 | 0.63972 | 0.00250 | 0.03365 |
| Gpn2          | 1.56 | 0.63958 | 0.00084 | 0.01994 |
| Aplf          | 1.56 | 0.63940 | 0.00032 | 0.01286 |
| Gemin8        | 1.56 | 0.63929 | 0.00369 | 0.03961 |
| Tnip1         | 1.56 | 0.63782 | 0.00138 | 0.02536 |
| Jakmip3       | 1.56 | 0.63711 | 0.00247 | 0.03355 |
| Cux1          | 1.55 | 0.63611 | 0.00282 | 0.03553 |
| Eny2          | 1.55 | 0.63590 | 0.00464 | 0.04382 |
| Gm15234       | 1.55 | 0.63570 | 0.00239 | 0.03320 |
| Gmfb          | 1.55 | 0.63515 | 0.00588 | 0.04960 |
| Naf1          | 1.55 | 0.63455 | 0.00182 | 0.02920 |
| Igf2r         | 1.55 | 0.63431 | 0.00072 | 0.01830 |
| Tex30         | 1.55 | 0.63404 | 0.00072 | 0.01830 |
| Hfe2          | 1.55 | 0.63393 | 0.00249 | 0.03359 |
| Fundc2        | 1.55 | 0.63383 | 0.00393 | 0.04073 |
| 3110040N11Rik | 1.55 | 0.63355 | 0.00188 | 0.02974 |

|               |      |         |         |         |
|---------------|------|---------|---------|---------|
| Pold4         | 1.55 | 0.63353 | 0.00065 | 0.01780 |
| Atp5s         | 1.55 | 0.63349 | 0.00450 | 0.04323 |
| Hcfc1r1       | 1.55 | 0.63164 | 0.00010 | 0.00749 |
| Arap2         | 1.55 | 0.63055 | 0.00189 | 0.02987 |
| Mob3b         | 1.55 | 0.63036 | 0.00351 | 0.03859 |
| Dgat1         | 1.55 | 0.63032 | 0.00058 | 0.01708 |
| Nsmce1        | 1.55 | 0.63004 | 0.00066 | 0.01780 |
| Scaf11        | 1.55 | 0.62978 | 0.00248 | 0.03357 |
| Mrps28        | 1.55 | 0.62918 | 0.00020 | 0.01037 |
| Sf3b1         | 1.55 | 0.62812 | 0.00034 | 0.01334 |
| 2610002J02Rik | 1.55 | 0.62782 | 0.00066 | 0.01780 |
| Sigirr        | 1.54 | 0.62735 | 0.00309 | 0.03680 |
| Tbce          | 1.54 | 0.62658 | 0.00194 | 0.03025 |
| B130040O20Rik | 1.54 | 0.62562 | 0.00307 | 0.03673 |
| Wac           | 1.54 | 0.62468 | 0.00379 | 0.04011 |
| Oxnad1        | 1.54 | 0.62409 | 0.00163 | 0.02758 |
| Suv39h2       | 1.54 | 0.62387 | 0.00117 | 0.02341 |
| Huwe1         | 1.54 | 0.62284 | 0.00020 | 0.01037 |
| Lmna          | 1.54 | 0.62202 | 0.00273 | 0.03493 |
| Zfp64         | 1.54 | 0.62123 | 0.00498 | 0.04545 |
| Nubp1         | 1.54 | 0.62123 | 0.00006 | 0.00532 |
| Slc6a8        | 1.54 | 0.62003 | 0.00292 | 0.03609 |
| Rapgef2       | 1.53 | 0.61758 | 0.00270 | 0.03481 |
| H2afv         | 1.53 | 0.61605 | 0.00155 | 0.02678 |
| A130004G11Rik | 1.53 | 0.61586 | 0.00111 | 0.02292 |
| Slc44a3       | 1.53 | 0.61497 | 0.00489 | 0.04501 |
| Psen2         | 1.53 | 0.61474 | 0.00112 | 0.02293 |
| Cbwd1         | 1.53 | 0.61442 | 0.00165 | 0.02790 |
| Grina         | 1.53 | 0.61255 | 0.00332 | 0.03789 |
| Gins3         | 1.53 | 0.61219 | 0.00162 | 0.02756 |
| Anxa6         | 1.53 | 0.61047 | 0.00113 | 0.02315 |
| 2810414N06Rik | 1.53 | 0.60977 | 0.00101 | 0.02198 |
| Dmap1         | 1.53 | 0.60969 | 0.00126 | 0.02412 |
| Lrsam1        | 1.53 | 0.60958 | 0.00462 | 0.04372 |
| Dlgap5        | 1.53 | 0.60899 | 0.00342 | 0.03828 |
| Fggy          | 1.52 | 0.60870 | 0.00011 | 0.00762 |
| Psmd14        | 1.52 | 0.60818 | 0.00353 | 0.03868 |
| Uevld         | 1.52 | 0.60813 | 0.00015 | 0.00909 |
| AU040320      | 1.52 | 0.60805 | 0.00043 | 0.01460 |

|               |      |         |         |         |
|---------------|------|---------|---------|---------|
| Kif2a         | 1.52 | 0.60576 | 0.00414 | 0.04165 |
| Tmem82        | 1.52 | 0.60560 | 0.00024 | 0.01123 |
| Tceanc        | 1.52 | 0.60466 | 0.00425 | 0.04218 |
| Arl8a         | 1.52 | 0.60431 | 0.00262 | 0.03426 |
| Pdzd11        | 1.52 | 0.60394 | 0.00417 | 0.04171 |
| Sox6          | 1.52 | 0.60269 | 0.00281 | 0.03547 |
| Wdsub1        | 1.52 | 0.60181 | 0.00394 | 0.04077 |
| Txn1          | 1.52 | 0.60158 | 0.00100 | 0.02190 |
| Itgb5         | 1.52 | 0.60138 | 0.00324 | 0.03745 |
| Tbc1d7        | 1.52 | 0.60086 | 0.00140 | 0.02561 |
| Ahnak         | 1.52 | 0.60078 | 0.00265 | 0.03449 |
| Mbnl2         | 1.52 | 0.59957 | 0.00244 | 0.03345 |
| Rabl3         | 1.52 | 0.59935 | 0.00051 | 0.01585 |
| Mpp5          | 1.51 | 0.59916 | 0.00497 | 0.04542 |
| Ermard        | 1.51 | 0.59804 | 0.00004 | 0.00470 |
| Ndufs4        | 1.51 | 0.59715 | 0.00005 | 0.00488 |
| 4833408D11Rik | 1.51 | 0.59475 | 0.00048 | 0.01530 |
| Hibch         | 1.51 | 0.59432 | 0.00047 | 0.01523 |
| Pyroxd1       | 1.51 | 0.59301 | 0.00027 | 0.01179 |
| Cyp4f15       | 1.51 | 0.59272 | 0.00027 | 0.01179 |
| Plekha1       | 1.51 | 0.59233 | 0.00162 | 0.02756 |
| Zrsr2         | 1.51 | 0.59125 | 0.00090 | 0.02071 |
| Tap2          | 1.51 | 0.59016 | 0.00251 | 0.03368 |
| Aig1          | 1.50 | 0.58972 | 0.00402 | 0.04113 |
| Wdr62         | 1.50 | 0.58872 | 0.00395 | 0.04077 |
| Pttg1ip       | 1.50 | 0.58766 | 0.00037 | 0.01374 |
| Vcp           | 1.50 | 0.58763 | 0.00122 | 0.02386 |
| Whamm         | 1.50 | 0.58754 | 0.00333 | 0.03796 |
| Ccdc181       | 1.50 | 0.58668 | 0.00157 | 0.02701 |
| Stom          | 1.50 | 0.58661 | 0.00343 | 0.03830 |
| Ywhaz         | 1.50 | 0.58582 | 0.00104 | 0.02216 |
| Sh3bgrl2      | 1.50 | 0.58428 | 0.00289 | 0.03599 |
| 1110012L19Rik | 1.50 | 0.58400 | 0.00126 | 0.02410 |
| Gpt           | 1.50 | 0.58343 | 0.00007 | 0.00611 |
| Hs2st1        | 1.50 | 0.58283 | 0.00410 | 0.04142 |
| Kctd15        | 1.50 | 0.58273 | 0.00417 | 0.04171 |
| G3bp2         | 1.50 | 0.58269 | 0.00094 | 0.02126 |
| N6amt2        | 1.50 | 0.58263 | 0.00196 | 0.03030 |
| Znr1as        | 1.50 | 0.58217 | 0.00036 | 0.01361 |

|               |      |          |         |         |
|---------------|------|----------|---------|---------|
| Psmb8         | 1.50 | 0.58176  | 0.00547 | 0.04760 |
| Sdc4          | 1.50 | 0.58153  | 0.00019 | 0.01028 |
| Dync1i2       | 1.50 | 0.58088  | 0.00053 | 0.01608 |
| Wash          | 1.50 | 0.58078  | 0.00136 | 0.02520 |
| Cnih4         | 1.50 | 0.58073  | 0.00029 | 0.01228 |
| St5           | 1.50 | 0.58071  | 0.00281 | 0.03546 |
| S100a13       | 0.66 | -0.59000 | 0.00158 | 0.02702 |
| Pcf11         | 0.66 | -0.59001 | 0.00305 | 0.03664 |
| Luc7l3        | 0.66 | -0.59059 | 0.00269 | 0.03471 |
| 1110038B12Rik | 0.66 | -0.59087 | 0.00010 | 0.00745 |
| Ttpal         | 0.66 | -0.59238 | 0.00108 | 0.02264 |
| Ifitm2        | 0.66 | -0.59592 | 0.00177 | 0.02872 |
| Bag4          | 0.66 | -0.60209 | 0.00214 | 0.03137 |
| Gtpbp4        | 0.66 | -0.60248 | 0.00231 | 0.03257 |
| Des           | 0.66 | -0.60340 | 0.00433 | 0.04260 |
| Ankrd9        | 0.66 | -0.60400 | 0.00051 | 0.01585 |
| Cdyl2         | 0.66 | -0.60469 | 0.00594 | 0.04981 |
| Tubg1         | 0.66 | -0.60584 | 0.00041 | 0.01431 |
| Vkorc1        | 0.66 | -0.60596 | 0.00002 | 0.00321 |
| Usp7          | 0.66 | -0.60842 | 0.00473 | 0.04420 |
| Bclaf1        | 0.66 | -0.60970 | 0.00196 | 0.03030 |
| Wdr26         | 0.66 | -0.61027 | 0.00147 | 0.02607 |
| Kbtbd8        | 0.65 | -0.61465 | 0.00592 | 0.04979 |
| Pltp          | 0.65 | -0.61588 | 0.00006 | 0.00572 |
| Caln1         | 0.65 | -0.61784 | 0.00521 | 0.04635 |
| Cp            | 0.65 | -0.61953 | 0.00408 | 0.04137 |
| Atf7          | 0.65 | -0.62028 | 0.00243 | 0.03340 |
| Usp53         | 0.65 | -0.62032 | 0.00118 | 0.02343 |
| Yae1d1        | 0.65 | -0.62036 | 0.00186 | 0.02961 |
| Rabac1        | 0.65 | -0.62049 | 0.00042 | 0.01449 |
| Thap2         | 0.65 | -0.62208 | 0.00095 | 0.02132 |
| BB182297      | 0.65 | -0.62411 | 0.00271 | 0.03485 |
| Akap12        | 0.65 | -0.62420 | 0.00017 | 0.00967 |
| C630043F03Rik | 0.65 | -0.62745 | 0.00260 | 0.03420 |
| Zfp629        | 0.65 | -0.62906 | 0.00022 | 0.01074 |
| Ttc30a1       | 0.64 | -0.63330 | 0.00095 | 0.02127 |
| Hook1         | 0.64 | -0.63464 | 0.00145 | 0.02595 |
| Gngt2         | 0.64 | -0.63528 | 0.00274 | 0.03498 |
| Tmem191c      | 0.64 | -0.63609 | 0.00072 | 0.01830 |

|               |      |          |         |         |
|---------------|------|----------|---------|---------|
| Tpst1         | 0.64 | -0.63693 | 0.00149 | 0.02630 |
| Ube2q1        | 0.64 | -0.64037 | 0.00348 | 0.03842 |
| Foxa3         | 0.64 | -0.64088 | 0.00361 | 0.03925 |
| Gimap9        | 0.64 | -0.64151 | 0.00125 | 0.02406 |
| Guca1a        | 0.64 | -0.64200 | 0.00495 | 0.04533 |
| Zfp949        | 0.64 | -0.64477 | 0.00175 | 0.02857 |
| 2300009A05Rik | 0.64 | -0.64544 | 0.00093 | 0.02104 |
| Casp8         | 0.64 | -0.64545 | 0.00416 | 0.04165 |
| Pbld2         | 0.64 | -0.64613 | 0.00334 | 0.03804 |
| Aldh3a2       | 0.64 | -0.64894 | 0.00198 | 0.03040 |
| Ilf2          | 0.64 | -0.65089 | 0.00014 | 0.00884 |
| Pradc1        | 0.64 | -0.65141 | 0.00393 | 0.04074 |
| Rpa3          | 0.64 | -0.65449 | 0.00075 | 0.01870 |
| C8b           | 0.63 | -0.65651 | 0.00313 | 0.03710 |
| Tnxb          | 0.63 | -0.65899 | 0.00173 | 0.02833 |
| Ifna2         | 0.63 | -0.66029 | 0.00388 | 0.04046 |
| Rap1gds1      | 0.63 | -0.66415 | 0.00033 | 0.01318 |
| Cyp3a25       | 0.63 | -0.66418 | 0.00416 | 0.04165 |
| Gm5113        | 0.63 | -0.66593 | 0.00143 | 0.02577 |
| Ccr5          | 0.63 | -0.67130 | 0.00302 | 0.03656 |
| Pyhin1        | 0.63 | -0.67189 | 0.00025 | 0.01152 |
| Nans          | 0.63 | -0.67394 | 0.00474 | 0.04426 |
| Pnn           | 0.63 | -0.67444 | 0.00317 | 0.03723 |
| Arl5b         | 0.63 | -0.67452 | 0.00423 | 0.04211 |
| Arhgap9       | 0.63 | -0.67587 | 0.00336 | 0.03804 |
| Cpne1         | 0.62 | -0.67878 | 0.00255 | 0.03398 |
| Mogs          | 0.62 | -0.67920 | 0.00056 | 0.01665 |
| Metrn         | 0.62 | -0.68170 | 0.00046 | 0.01506 |
| Tspan33       | 0.62 | -0.68459 | 0.00061 | 0.01732 |
| 4933431K14Rik | 0.62 | -0.68731 | 0.00368 | 0.03957 |
| Srd5a1        | 0.62 | -0.68820 | 0.00356 | 0.03889 |
| Vegfa         | 0.62 | -0.68859 | 0.00216 | 0.03146 |
| Abcg3         | 0.62 | -0.68910 | 0.00495 | 0.04534 |
| Pald1         | 0.62 | -0.68966 | 0.00012 | 0.00808 |
| Rfxap         | 0.62 | -0.69016 | 0.00336 | 0.03804 |
| Derl3         | 0.62 | -0.69030 | 0.00241 | 0.03335 |
| Fam184a       | 0.62 | -0.69068 | 0.00062 | 0.01742 |
| Haus7         | 0.62 | -0.69133 | 0.00100 | 0.02179 |
| Slc25a28      | 0.62 | -0.69141 | 0.00112 | 0.02293 |

|               |      |          |         |         |
|---------------|------|----------|---------|---------|
| Tada2b        | 0.62 | -0.69380 | 0.00435 | 0.04263 |
| Msh2          | 0.61 | -0.70383 | 0.00511 | 0.04601 |
| Rdh9          | 0.61 | -0.70475 | 0.00335 | 0.03804 |
| Igkv8-30      | 0.61 | -0.70846 | 0.00228 | 0.03231 |
| Tpp2          | 0.61 | -0.71017 | 0.00155 | 0.02678 |
| Hexim1        | 0.61 | -0.71476 | 0.00319 | 0.03729 |
| Slc27a2       | 0.61 | -0.71655 | 0.00065 | 0.01780 |
| Nrep          | 0.61 | -0.72095 | 0.00348 | 0.03842 |
| Msl1          | 0.61 | -0.72244 | 0.00244 | 0.03345 |
| Igfals        | 0.61 | -0.72245 | 0.00046 | 0.01501 |
| Irgq          | 0.61 | -0.72376 | 0.00526 | 0.04663 |
| Stbd1         | 0.60 | -0.72659 | 0.00432 | 0.04250 |
| Dnajb1        | 0.60 | -0.72907 | 0.00014 | 0.00884 |
| Igj           | 0.60 | -0.73048 | 0.00029 | 0.01241 |
| Zfp39         | 0.60 | -0.73097 | 0.00207 | 0.03102 |
| Glo1          | 0.60 | -0.73110 | 0.00124 | 0.02397 |
| Cyp2c70       | 0.60 | -0.73737 | 0.00072 | 0.01827 |
| 1810009N02Rik | 0.60 | -0.74030 | 0.00145 | 0.02593 |
| Fam120aos     | 0.60 | -0.74083 | 0.00027 | 0.01179 |
| Pcmdt1        | 0.60 | -0.74276 | 0.00184 | 0.02936 |
| Ccdc85b       | 0.60 | -0.74348 | 0.00004 | 0.00455 |
| P2ry13        | 0.60 | -0.74441 | 0.00519 | 0.04633 |
| Pqlc1         | 0.60 | -0.74445 | 0.00380 | 0.04014 |
| Hapln4        | 0.60 | -0.74836 | 0.00063 | 0.01765 |
| Slc40a1       | 0.60 | -0.74886 | 0.00056 | 0.01665 |
| 4930453N24Rik | 0.60 | -0.74887 | 0.00072 | 0.01830 |
| Ivns1abp      | 0.59 | -0.76704 | 0.00457 | 0.04357 |
| Tbc1d2b       | 0.58 | -0.77381 | 0.00015 | 0.00909 |
| Macrod1       | 0.58 | -0.77578 | 0.00223 | 0.03193 |
| Cyp7b1        | 0.58 | -0.77821 | 0.00104 | 0.02221 |
| Ifit2         | 0.58 | -0.78287 | 0.00248 | 0.03355 |
| Echdc2        | 0.58 | -0.79138 | 0.00208 | 0.03111 |
| Cd163l1       | 0.58 | -0.79626 | 0.00429 | 0.04241 |
| A1cf          | 0.58 | -0.79697 | 0.00003 | 0.00414 |
| Irgm1         | 0.57 | -0.79968 | 0.00096 | 0.02137 |
| LOC102643033  | 0.57 | -0.80585 | 0.00014 | 0.00863 |
| Pcyox1        | 0.57 | -0.80901 | 0.00075 | 0.01870 |
| Nop56         | 0.57 | -0.81076 | 0.00028 | 0.01220 |
| Hsd17b2       | 0.57 | -0.81125 | 0.00122 | 0.02386 |

|               |      |          |         |         |
|---------------|------|----------|---------|---------|
| Srp54b        | 0.57 | -0.81915 | 0.00455 | 0.04352 |
| Nup160        | 0.57 | -0.82091 | 0.00010 | 0.00725 |
| Fam117a       | 0.57 | -0.82249 | 0.00003 | 0.00395 |
| Tppp          | 0.56 | -0.82556 | 0.00500 | 0.04551 |
| Slbp          | 0.56 | -0.83213 | 0.00492 | 0.04516 |
| Mfhas1        | 0.56 | -0.83960 | 0.00002 | 0.00330 |
| B3galnt1      | 0.56 | -0.84559 | 0.00264 | 0.03449 |
| Igfbp2        | 0.55 | -0.84957 | 0.00381 | 0.04018 |
| S100a1        | 0.55 | -0.85302 | 0.00000 | 0.00213 |
| Inhbc         | 0.55 | -0.85569 | 0.00066 | 0.01780 |
| Zfp280b       | 0.55 | -0.85819 | 0.00037 | 0.01383 |
| Itih3         | 0.55 | -0.86002 | 0.00032 | 0.01290 |
| 5430416N02Rik | 0.55 | -0.86983 | 0.00040 | 0.01425 |
| Slc7a2        | 0.55 | -0.87012 | 0.00101 | 0.02196 |
| Metrn1        | 0.55 | -0.87370 | 0.00143 | 0.02577 |
| Pdgfc         | 0.55 | -0.87497 | 0.00292 | 0.03609 |
| Srsf3         | 0.54 | -0.88111 | 0.00053 | 0.01605 |
| Ppp1r3c       | 0.54 | -0.88244 | 0.00247 | 0.03355 |
| Paqr9         | 0.54 | -0.89497 | 0.00315 | 0.03722 |
| Tnfaip8l1     | 0.54 | -0.89781 | 0.00012 | 0.00808 |
| Dhx58         | 0.53 | -0.90892 | 0.00198 | 0.03042 |
| Pdilt         | 0.53 | -0.91210 | 0.00202 | 0.03055 |
| Dnph1         | 0.53 | -0.92035 | 0.00042 | 0.01433 |
| Mfsd12        | 0.53 | -0.92429 | 0.00064 | 0.01765 |
| Irgm2         | 0.53 | -0.92809 | 0.00082 | 0.01971 |
| Lrrc16a       | 0.52 | -0.94677 | 0.00260 | 0.03420 |
| Defb1         | 0.52 | -0.94700 | 0.00092 | 0.02090 |
| Grem2         | 0.52 | -0.95096 | 0.00425 | 0.04219 |
| Ndufaf2       | 0.52 | -0.95484 | 0.00086 | 0.02018 |
| 5330438D12Rik | 0.51 | -0.95982 | 0.00483 | 0.04469 |
| Srgap3        | 0.51 | -0.97139 | 0.00028 | 0.01218 |
| Cml1          | 0.51 | -0.97196 | 0.00073 | 0.01835 |
| Crot          | 0.51 | -0.98280 | 0.00257 | 0.03409 |
| Slco1a4       | 0.50 | -0.98637 | 0.00003 | 0.00395 |
| Tm9sf1        | 0.50 | -0.98748 | 0.00214 | 0.03137 |
| Elovl2        | 0.50 | -0.99966 | 0.00344 | 0.03834 |
| Vegfb         | 0.50 | -1.00256 | 0.00076 | 0.01872 |
| Cpeb4         | 0.49 | -1.02507 | 0.00212 | 0.03133 |
| Il1r1         | 0.49 | -1.03004 | 0.00142 | 0.02577 |



|               |      |          |         |         |
|---------------|------|----------|---------|---------|
| Avpr1a        | 0.49 | -1.03903 | 0.00494 | 0.04526 |
| Tspyl2        | 0.49 | -1.03932 | 0.00519 | 0.04633 |
| Fras1         | 0.48 | -1.04932 | 0.00168 | 0.02798 |
| Cables2       | 0.48 | -1.05179 | 0.00002 | 0.00343 |
| Plcxd2        | 0.48 | -1.06477 | 0.00480 | 0.04458 |
| Lin7a         | 0.48 | -1.07240 | 0.00113 | 0.02308 |
| Erdr1         | 0.48 | -1.07291 | 0.00183 | 0.02931 |
| Ddit3         | 0.47 | -1.07586 | 0.00177 | 0.02870 |
| Gm4951        | 0.47 | -1.07655 | 0.00015 | 0.00899 |
| Cyp2c44       | 0.47 | -1.08391 | 0.00360 | 0.03918 |
| Ppm1m         | 0.47 | -1.10337 | 0.00101 | 0.02196 |
| Pold2         | 0.46 | -1.10529 | 0.00052 | 0.01585 |
| Ccdc30        | 0.45 | -1.14007 | 0.00292 | 0.03609 |
| Tm2d2         | 0.45 | -1.14921 | 0.00067 | 0.01782 |
| 4933411B09Rik | 0.45 | -1.15719 | 0.00431 | 0.04250 |
| Hacl1         | 0.44 | -1.18259 | 0.00142 | 0.02577 |
| Efna1         | 0.44 | -1.19362 | 0.00405 | 0.04116 |
| Pdia6         | 0.44 | -1.19407 | 0.00454 | 0.04340 |
| Herpud1       | 0.41 | -1.26975 | 0.00395 | 0.04077 |
| Zfp963        | 0.41 | -1.28101 | 0.00014 | 0.00884 |
| Adamdec1      | 0.41 | -1.28363 | 0.00465 | 0.04382 |
| Hspb1         | 0.41 | -1.29560 | 0.00151 | 0.02652 |
| Slc16a6       | 0.40 | -1.31335 | 0.00135 | 0.02518 |
| 5430417L22Rik | 0.40 | -1.33973 | 0.00044 | 0.01471 |
| Al195470      | 0.39 | -1.34878 | 0.00096 | 0.02144 |
| Ppp1r3b       | 0.39 | -1.36542 | 0.00498 | 0.04545 |
| Cyp2d13       | 0.39 | -1.36575 | 0.00098 | 0.02170 |
| Sox6os        | 0.38 | -1.39592 | 0.00065 | 0.01780 |
| Cdk2          | 0.37 | -1.41564 | 0.00110 | 0.02275 |
| Gpr110        | 0.37 | -1.41620 | 0.00013 | 0.00863 |
| Pik3r1        | 0.37 | -1.42785 | 0.00389 | 0.04054 |
| Notum         | 0.35 | -1.52127 | 0.00003 | 0.00395 |
| Egfr          | 0.35 | -1.52624 | 0.00118 | 0.02343 |
| Ostc          | 0.33 | -1.58012 | 0.00242 | 0.03338 |
| Nrn1          | 0.33 | -1.60291 | 0.00366 | 0.03948 |
| Hsd17b6       | 0.33 | -1.60770 | 0.00049 | 0.01550 |
| Mpp4          | 0.33 | -1.61726 | 0.00265 | 0.03449 |
| Gas1          | 0.32 | -1.62655 | 0.00006 | 0.00572 |
| Cadm4         | 0.32 | -1.65468 | 0.00022 | 0.01081 |

|               |      |          |         |         |
|---------------|------|----------|---------|---------|
| Tial1         | 0.32 | -1.65567 | 0.00003 | 0.00382 |
| Fabp5         | 0.31 | -1.67389 | 0.00562 | 0.04836 |
| Serpina7      | 0.31 | -1.69143 | 0.00386 | 0.04044 |
| S1pr1         | 0.31 | -1.70034 | 0.00018 | 0.01000 |
| Cadps2        | 0.31 | -1.70428 | 0.00202 | 0.03051 |
| Aox3          | 0.30 | -1.72610 | 0.00000 | 0.00120 |
| 2900064B18Rik | 0.25 | -2.02260 | 0.00498 | 0.04545 |
| Pgp           | 0.23 | -2.12056 | 0.00012 | 0.00808 |
| Lect1         | 0.21 | -2.22855 | 0.00004 | 0.00466 |
| Gm16551       | 0.19 | -2.40591 | 0.00039 | 0.01402 |
| Dio1          | 0.17 | -2.54918 | 0.00071 | 0.01827 |
| Adh6-ps1      | 0.12 | -3.09508 | 0.00553 | 0.04784 |
| Gm2788        | 0.07 | -3.82958 | 0.00006 | 0.00521 |
| Ugt2b38       | 0.02 | -5.84085 | 0.00002 | 0.00343 |
| Moxd1         | 0.01 | -6.55622 | 0.00034 | 0.01331 |

**Supplemental Table 1.** Genes with a Fold Change (FC)>1.5 and a statistically significant difference ( $Q$ -value<0.05) are listed. Microarray data was obtained in pre-symptomatic, 3-month old wild-type and *Atp7b*<sup>-/-</sup> mice.

## Supplemental Methods

### Hepatic metabolite measurements

Analysis were carried out on 1290 high-performance liquid chromatography with a degasser, binary pump, thermostat auto sampler and column oven (Agilent Technologies, Santa Clara, CA) connected to mass spectrometry equipped with electrospray ionization (ESI). The typical operating source parameters used were as follows: Gas temperature 250°C; Gas flow 14 l/min; Nebulizer gas pressure is 20 psi; Sheath gas temperature is 350°C; Sheath gas flow is 12 l/min; Capillary voltage 3000 V negative; Nozzle voltage 1500 V negative. The metabolites were separated on column ((Luna 3 $\mu$ M NH<sub>2</sub> 100A<sup>0</sup>, 150 $\times$ 2 mm) using mobile phase A and B comprised of 5mM ammonium acetate in water and 100% acetonitrile, respectively. The gradient program is as follow: 0 min-80% of B (0.2ml/min); 20 min- 2% of B (0.2ml/min), 20.1 min-2% of B (0.3ml/min), 25 min-80% B (0.3ml/min), 30 min 80% of B(0.35ml/min), 35min 80% of B (0.4ml/min), 37.8 min 80% of B (0.4ml/min) 37.99 min 80% B (0.2ml) followed by re-equilibration end of the gradient 37.99 min to the initial starting condition 80% B. Approximately 8–11 data points were acquired per detected metabolite. All the standards were acquired in the scan mode mass range 50-1200 Da using ESI negative mode. The most abundant fragment ions were used as quantifiers. All the metabolites were measured by multiple reaction-monitoring (MRM) mode.

Glycolytic and TCA cycle metabolites were extracted with 750  $\mu$ L of ice-cold methanol: water (4:1) containing 20  $\mu$ L spiked internal standard. Ice-cold chloroform and water were added in a 3:1 ratio for a final proportion of 4:3:2 methanol: chloroform: water. Both the organic and aqueous layers were combined, dried and suspended in 50:50 methanol: water. The suspended samples were subjected to deproteinization using a 3kDa molecular filter (Amicon ultracel-3K Membrane; Millipore Corporation, Billerica, MA), and the filtrate was dried under vacuum

(Genevac EZ-2plus, NY). Prior to mass spectrometry, the dried extracts were suspended in 50:50 methanol: water and subjected to LC-MS/MS.

### **Hyperinsulinemic euglycemic clamp**

Mice were anesthetized, and a midline neck incision was made to expose the jugular vein. A microcannula was inserted into the jugular vein, threaded into the right atrium, and anchored at the venotomy site. Mice were allowed to recover for 4 days with *ad libitum* access to water and food. Following an overnight fast, the conscious mice received a primary infusion (10  $\mu\text{Ci}$ ) and then a constant rate intravenous infusion (0.1  $\mu\text{Ci}/\text{min}$ ) of chromatography-purified [ $3\text{-}^3\text{H}$ ]-glucose using a syringe infusion pump. For determination of basal glucose production, blood samples were collected after 50 and 60 min of labeled glucose infusion. After 60 min, mice were infused continuously for 2 hours with human insulin (2.5 mU/kg/min). Simultaneously, 25% glucose was infused using another infusion pump at a rate adjusted to maintain the blood glucose level at 100–140 mg/dl (euglycemia). Blood glucose concentration was measured every 10 min by a glucometer, and glucose production rate, peripheral glucose disposal rate, and glucose infusion rate were then calculated. To estimate insulin-stimulated glucose uptake in individual tissues 2- $^{14}\text{C}$ -deoxyglucose (2DG) was administered as a bolus (10  $\mu\text{Ci}$ ) at 45 min before the end of the clamps. Glucose uptake in different tissues was calculated from plasma 2- $^{14}\text{C}$  deoxyglucose profile fitted with double exponential curve and tissue content of 2- $^{14}\text{C}$  deoxyglucose-6-phosphate.
